20 **Abstract**

21 Integrating association results from both genome-wide association studies (GWASs) and  
22 expression quantitative trait locus (eQTL) mapping studies has the potential to shed light on the  
23 molecular mechanisms underlying disease etiology. Several statistical methods have been  
24 recently developed to integrate GWASs with eQTL studies in the form of transcriptome-wide  
25 association studies (TWASs). These existing methods can all be viewed as a form of two sample  
26 Mendelian randomization (MR) analysis, which has been widely applied in various GWASs for  
27 inferring the causal relationship among complex traits. Unfortunately, most existing TWAS and  
28 MR methods make an unrealistic modeling assumption and assume that instrumental variables  
29 do not exhibit horizontal pleiotropic effects. However, horizontal pleiotropic effects have been  
30 recently discovered to be wide spread across complex traits, and, as we will show here, are also  
31 wide spread across gene expression traits. Therefore, not allowing for horizontal pleiotropic  
32 effects can be overly restrictive, and, as we will be show here, can lead to a substantial inflation  
33 of test statistics and subsequently false discoveries in TWAS applications. Here, we present a  
34 probabilistic MR method, which we refer to as PMR-Egger, for testing and controlling for  
35 horizontal pleiotropic effects in TWAS applications. PMR-Egger relies on an MR likelihood  
36 framework that unifies many existing TWAS and MR methods, accommodates multiple  
37 correlated instruments, tests the causal effect of gene on trait in the presence of horizontal  
38 pleiotropy, and, with a newly developed parameter expansion version of the expectation  
39 maximization algorithm, is scalable to hundreds of thousands of individuals. With extensive  
40 simulations, we show that PMR-Egger provides calibrated type I error control for causal effect  
41 testing in the presence of horizontal pleiotropic effects, is reasonably robust for various types of  
42 horizontal pleiotropic effect mis-specifications, is more powerful than existing MR approaches,

43 and, as a by-product, can directly test for horizontal pleiotropy. We illustrate the benefits of  
44 PMR-Egger in applications to 39 diseases and complex traits obtained from three GWASs  
45 including the UK Biobank. In these applications, we show how PMR-Egger can lead to new  
46 biological discoveries through integrative analysis.

47

## 48 **Introduction**

49 Genome-wide association studies (GWASs) have identified many SNPs associated with common  
50 diseases or disease related traits. Parallel expression quantitative trait loci (eQTL) mapping  
51 studies have also identified many cis-acting SNPs associated with the expression level of nearby  
52 genes. Integrating the existing association results from both GWASs and eQTL mapping studies  
53 has the potential to shed light on the molecular mechanisms underlying disease etiology. Several  
54 statistical methods have been recently proposed to integrate GWASs with eQTL mapping studies.  
55 For example prediXcan<sup>1</sup> proposes to perform a weighted SNP set test in GWAS by inferring  
56 SNP weights from eQTL studies. TWAS<sup>2</sup> proposes to infer the association between gene  
57 expression and disease trait by leveraging the shared common set of cis-SNPs. SMR<sup>3</sup> or GSMR<sup>4</sup>  
58 directly tests the causal association between gene expression and disease trait under a Mendelian  
59 randomization (MR) framework through selecting a single instrument or multiple independent  
60 instruments. While each of these integrative methods was originally proposed to solve a different  
61 problem, all of them can be viewed as a two-sample MR method with different modeling  
62 assumptions. Because of their relationship to MR, these methods effectively attempt to identify  
63 genes causally associated with diseases or complex traits in the context of transcriptome-wide  
64 association studies (TWAS).

65 MR analysis is a form of instrumental variable analysis that was originally developed in the  
66 field of causal inference<sup>5</sup>. MR aims to determine the causal relationship between an exposure  
67 variable (e.g. gene expression) and an outcome variable (e.g. complex trait) in observational  
68 studies. MR treats SNPs as instrumental variables for the exposure variable of interest and uses  
69 these SNP instruments to estimate and test the causal effect of the exposure variable on the  
70 outcome variable. MR methods have been widely applied to investigate the causal relationship

71 among various complex traits<sup>6-9</sup>, and, through a two-sample design, can be easily adapted to  
72 settings where the exposure and outcome are measured on two different sets of individuals<sup>10,11</sup>.  
73 However, MR analysis for TWAS is not straightforward and requires the development of new  
74 methods that can accommodate two important features of TWAS analysis.

75 First, both GWASs and eQTL mapping studies collect SNPs that are in high linkage  
76 disequilibrium (LD) with each other. Traditional MR methods, such as the random effects  
77 version or the fixed effect version of the inverse variance weighted regression<sup>12</sup>, MR-Egger<sup>13</sup>,  
78 median-based regression<sup>14</sup>, SMR<sup>3</sup>, or GSMR<sup>4</sup>, can only make use of a single SNP instrument or  
79 multiple independent SNP instruments. Handling only independent SNPs is restrictive, as most  
80 exposure variables/molecular traits are polygenic/omni-genic and are influenced by multiple  
81 SNPs that are in potential LD with each other. As a result, incorporating multiple correlated  
82 SNPs can often help explain a greater proportion of variance in the exposure variable than using  
83 independent SNPs, and thus can help increase power and improve estimation accuracy of MR  
84 analysis<sup>5,15-17</sup>. Due to the benefits of using multiple correlated instruments, most TWAS methods  
85 (e.g. PrediXcan<sup>1</sup>, TWAS<sup>2</sup>, CoMM<sup>18</sup>, DPR<sup>19</sup>, TIGAR<sup>20</sup>) rely on polygenic modeling priors to  
86 incorporate all cis-SNPs that are in high LD for TWAS applications. (Certainly, while the prior  
87 used in PrediXcan is polygenic, the parameter estimates obtained from PrediXcan is sparse as it  
88 uses posterior mode instead of posterior mean.) By incorporating all cis-SNPs, as we will show  
89 below, these methods can lead to substantial power improvement over standard MR approaches  
90 that use only a few independent SNPs. Unfortunately, many TWAS methods rely on a two-stage  
91 MR inference procedure: they estimate SNP effect sizes in the exposure study and plug in these  
92 estimates to the outcome study for causal effect inference. The two-stage inference procedure in  
93 MR fails to account for the uncertainty in parameter estimates in the exposure study and can

94 often lead to biased causal effect estimates and power loss, especially in the presence of weak  
95 instruments<sup>5,16</sup>. Indeed, similar to what have been observed in the MR field, our previous study  
96 also suggests that the likelihood based inference can substantially improve power for TWAS<sup>18</sup>.  
97 Therefore, it is important to incorporate multiple correlated instruments in a likelihood inference  
98 framework for MR analysis in TWAS.

99 Second, perhaps more importantly, SNP instruments often exhibit pervasive horizontal  
100 pleiotropic effects<sup>21</sup>. Horizontal pleiotropy occurs when a genetic variant affects the outcome  
101 variable through pathways other than or in addition to the exposure variable<sup>22</sup>. Horizontal  
102 pleiotropy is in contrast to the vertical pleiotropy, which characterizes instrument effects on the  
103 outcome variable through the path of the exposure. Horizontal pleiotropy is widely distributed  
104 across the genome, affects a wide spectrum of complex traits, and can be driven by LD and  
105 extreme polygenicity of traits<sup>21 23</sup>. Despite its wide prevalence, however, only a limited number  
106 of MR methods have been developed to test and control for horizontal pleiotropy; even fewer are  
107 applicable for TWAS applications. For example, some existing methods (e.g. MR-PRESSO<sup>21</sup>)  
108 test for horizontal pleiotropic effects without directly controlling for them. Some methods (e.g.  
109 CaMMEL<sup>24</sup>) control for horizontal pleiotropic effects without directly testing them<sup>25,26</sup>. Some  
110 methods (e.g. Egger regression<sup>13,27</sup>, GLIDE<sup>28</sup>, GSMR<sup>4</sup>, MR-median method<sup>14</sup>, profile score  
111 approach<sup>29</sup>, MRMix<sup>30</sup> and Bayesian MR<sup>31,32</sup>) test and control for horizontal pleiotropic effects,  
112 but can only accommodate independent instruments. As far as we are aware, there is only one  
113 two-sample MR method currently developed for testing and controlling for pleiotropic effects in  
114 the presence of correlated instruments: LDA MR-Egger<sup>33</sup>. Unfortunately, as we will show below,  
115 LDA MR-Egger cannot handle realistic LD pattern among cis-SNPs for TWAS applications.

116 Here, we develop a generative two-sample MR method in a likelihood framework, which we  
117 refer to as the probabilistic two-sample Mendelian randomization (PMR), to perform MR  
118 analysis using multiple correlated instruments for TWAS applications. We illustrate how the  
119 PMR framework can facilitate the understanding of many existing MR approaches as well as  
120 many existing integrative analysis approaches. Within the PMR framework, we focus on a  
121 particular horizontal pleiotropy effect modeling assumption based on the burden test assumption  
122 commonly used for rare variant test. This particular horizontal pleiotropy effect, as we will show  
123 later, effectively generalizes the Egger regression assumption commonly used for MR analysis to  
124 correlated instruments. Our method allows us to test the causal effect in the presence of  
125 horizontal pleiotropy, and, with a parameter expansion version of the expectation maximization  
126 algorithm (PX-EM), is scalable to hundreds of thousands of individuals. We refer to our method  
127 as PMR-Egger. With simulations, we show that PMR-Egger provides calibrated type I error for  
128 causal effect testing in the presence of horizontal pleiotropic effects, is more powerful than  
129 existing MR approaches, and, as a by-product, can directly test for horizontal pleiotropy. We  
130 apply our method to perform TWAS for 39 diseases and complex traits obtained from three  
131 GWASs with sample size ranging from 4,686 to 337,198.  
132

## 133 **Methods**

### 134 **PMR-Egger Overview**

135 We consider a probabilistic Mendelian randomization framework for performing two-sample  
136 Mendelian randomization analysis with correlated SNP instruments. Two-sample Mendelian  
137 randomization analysis aims to estimate and test for the causal effect of an exposure on an  
138 outcome in the setting where the exposure and outcome variables are measured in two separate  
139 studies with no sample overlap. In the TWAS applications we consider here, the exposure  
140 variable is gene expression level that is measured in a gene expression study, while the outcome  
141 variable is a quantitative trait or a dichotomous disease status that is measured in a GWAS. Often  
142 times, the gene expression study and GWAS are performed on two separate samples. While we  
143 mostly focus on TWAS applications in the present study, we note that the two-sample Mendelian  
144 randomization is also commonly performed in settings where both the exposure and outcome  
145 variables are complex traits that are measured in two separate GWASs. An illustrative diagram  
146 of MR analysis is displayed in [Supplementary Fig. 1](#).

147 We denote  $\mathbf{x}$  as an  $n_1$ -vector of exposure variable (i.e. gene expression measurements) that is  
148 measured on  $n_1$  individuals in the gene expression study and denote  $\mathbf{Z}_x$  as an  $n_1$  by  $p$  matrix of  
149 genotypes for  $p$  instruments (i.e. cis-SNPs) in the same study. Note that, unlike standard MR  
150 methods that select independent instruments, we follow existing TWAS approaches and use all  
151 cis-SNPs that are in LD as instruments. We denote  $\mathbf{y}$  as an  $n_2$ -vector of outcome variable (i.e.  
152 trait) that is measured on  $n_2$  individuals in the GWAS and denote  $\mathbf{Z}_y$  as an  $n_2$  by  $p$  matrix of  
153 genotypes for the same  $p$  instruments there. We consider three linear regressions to model the  
154 two studies separately

$$155 \quad \mathbf{x} = \mathbf{1}_{n_1} \mu_x + \mathbf{Z}_x \boldsymbol{\beta} + \boldsymbol{\varepsilon}_x \quad (1)$$



156 
$$\tilde{x} = \mathbf{1}_{n_2}\mu_x + \mathbf{Z}_y\boldsymbol{\beta} + \boldsymbol{\varepsilon}_{\tilde{x}} \quad (2)$$

157 
$$\mathbf{y} = \mathbf{1}_{n_2}\mu_y + \tilde{x}\alpha + \mathbf{Z}_y\boldsymbol{\gamma} + \boldsymbol{\varepsilon} \quad (3)$$

158 where the equation (1) is for the gene expression data and the equations (2)-(3) are for the  
159 GWAS data. Here,  $\mu_x$  and  $\mu_y$  are the intercepts;  $\tilde{x}$  is an unobserved  $n_2$ -vector of exposure  
160 variable on the  $n_2$  individuals in the GWAS;  $\boldsymbol{\beta}$  is a  $p$ -vector of instrumental effect sizes on the  
161 exposure variable;  $\alpha$  is a scalar that represents the causal effect of the exposure variable on the  
162 outcome variable;  $\boldsymbol{\gamma}$  is a  $p$ -vector of horizontal pleiotropic effect sizes of  $p$  instruments on the  
163 outcome variable;  $\boldsymbol{\varepsilon}_x$  is an  $n_1$ -vector of residual error with each element independently and  
164 identically distributed from a normal distribution  $N(0, \sigma_x^2)$ ;  $\boldsymbol{\varepsilon}_{\tilde{x}}$  is an  $n_2$ -vector of residual error  
165 with each element independently and identically distributed from the same normal distribution  
166  $N(0, \sigma_x^2)$ ; and  $\boldsymbol{\varepsilon}$  is an  $n_2$ -vector of residual error with each element independently and identically  
167 distributed from a normal distribution  $N(0, \sigma_y^2)$ . We note that while the above three equations are  
168 specified based on two separate studies, they are joined together with the common parameter  $\boldsymbol{\beta}$   
169 and the unobserved gene expression measurements  $\tilde{x}$ . Equations (2)-(3) can also be combined  
170 into

171 
$$\mathbf{y} = \mathbf{1}_{n_2}\mu_y + \mathbf{Z}_y\boldsymbol{\beta}\alpha + \mathbf{Z}_y\boldsymbol{\gamma} + \boldsymbol{\varepsilon}_y \quad (4)$$

172 where  $\boldsymbol{\varepsilon}_y = \boldsymbol{\varepsilon}_{\tilde{x}}\alpha + \boldsymbol{\varepsilon}$ .

173 Our key parameter of interest in the above joint model is the causal effect  $\alpha$ . The causal  
174 interpretation of  $\alpha$  requires two assumptions of MR analysis to hold: (i) instruments are  
175 associated with the exposure; (ii) instruments are not associated with any other confounders that  
176 may be associated with both exposure and outcome. Note that our model no longer requires the  
177 general exclusion restriction condition of traditional MR (i.e. instruments only influence the  
178 outcome through the path of exposure), as we make explicit modeling assumptions on the

179 horizontal pleiotropy effects  $\boldsymbol{\gamma}$ . Certainly, PMR-Egger still need to satisfy the InSIDE  
180 assumption that the instrument-exposure effects and instrument-outcome effects are independent  
181 of each other, which is sometimes referred to as the weak exclusion restriction condition<sup>13</sup>. In our  
182 model, we derive the causal interpretation and identification of  $\alpha$  under the decision-theoretic  
183 framework of causal inference<sup>31,34-36</sup> (details in [Supplementary Note](#)). Because the causal effect  
184 interpretation of  $\alpha$  depends on MR assumptions as well as other explicit modeling assumptions,  
185 many of which are not easily testable in practice, MR analysis in observational studies likely  
186 provides weaker causality evidence than randomized clinical trials. Therefore, while we follow  
187 standard MR analysis and use the term “causal effect” through the text, we only intend to use this  
188 term to emphasize the fact that  $\alpha$  estimate from an MR analysis is more trustworthy than the  
189 effect size estimate in a standard linear regression of  $y$  on  $\tilde{x}$ .

190 Because  $p$  is often larger than  $n_1$ , we will need to make additional modeling assumptions on  $\boldsymbol{\beta}$   
191 to make the model identifiable. In addition, the two instrumental effect terms defined in equation  
192 (4), the vertical pleiotropic effect  $\mathbf{Z}_y\boldsymbol{\beta}\alpha$  and the horizontal pleiotropic effect  $\mathbf{Z}_y\boldsymbol{\gamma}$ , are also not  
193 identifiable from each other, unless we make additional modeling assumptions on  $\boldsymbol{\gamma}$ . Here, we  
194 follow standard polygenic model and assume that all elements in  $\boldsymbol{\beta}$  are non-zero and that each  
195 follows a normal distribution  $N(0, \sigma_\beta^2)$ . In addition, we follow the burden test assumption  
196 commonly used for rare variant test and assume that equal horizontal pleiotropic effects across  
197 SNPs  $\boldsymbol{\gamma}_j = \gamma$  for  $j = 1, \dots, p$ . With the burden test assumption on the horizontal pleiotropic  
198 effects  $\gamma$ , our model becomes a generalization of the commonly used MR-Egger regression  
199 model. In the special case where instruments are independent and treated as fixed effects and  
200 where a two-stage estimation procedure is used for inference, our model reduces to MR-Egger.  
201 However, our method can handle general cases where MR-Egger does not apply to. In particular,

202 unlike MR-Egger, our method can handle multiple correlated instruments and perform inference  
203 in a likelihood framework.

204 In the above model, we are interested in estimating the causal effect  $\alpha$  and testing the null  
205 hypothesis  $H_0: \alpha = 0$  in the presence of horizontal pleiotropy effects  $\boldsymbol{\gamma}$ . In addition, we are  
206 interested in estimating the horizontal pleiotropic effect size  $\gamma$  and testing the null hypothesis  
207  $H_0: \gamma = 0$ . We accomplish both tasks through the maximum likelihood inference framework. In  
208 particular, we develop an expectation maximization (EM) algorithm for parameter inference by  
209 maximizing the joint likelihood defined based on equations (1) and (4) (details in the  
210 [Supplementary Note](#)). The EM algorithm allows us to obtain the maximum likelihood of the  
211 joint model, together with maximum likelihood estimates for both  $\alpha$  and  $\gamma$ . In addition, we apply  
212 the EM algorithm to two reduced models, one without  $\alpha$  and the other without  $\gamma$ , to obtain the  
213 corresponding maximum likelihoods. Afterwards, we perform likelihood ratio tests for either  
214  $H_0: \alpha = 0$  or  $H_0: \gamma = 0$ , by contrasting the maximum likelihood obtained from the joint model to  
215 that obtained from each of the two reduced models, respectively. We refer to the above inference  
216 procedure as probabilistic, as we place estimation and testing into a maximum likelihood  
217 framework. Our inference procedure is in contrast to the commonly used two-stage estimation  
218 procedure (as used in, for example, Egger regression<sup>13,27</sup>, PrediXcan<sup>1</sup> and TWAS<sup>2</sup>), which  
219 estimates  $\hat{\boldsymbol{\beta}}$  from equation (1) first and then plug in the estimates into equation (4) for inference.  
220 The previous two-stage estimation procedure fails to properly account for the estimation  
221 uncertainty in  $\hat{\boldsymbol{\beta}}$  and is known to lose power compared to a formal likelihood inference  
222 procedure<sup>5,16,18</sup>.

223 We refer to our model and algorithm together as the two-sample probabilistic Mendelian  
224 randomization with Egger regression (PMR-Egger). As explained above, we use “probabilistic”

225 to refer to both the data generative model and the maximum likelihood inference procedure. We  
226 use “Egger” to refer to the horizontal pleiotropic assumption on  $\boldsymbol{\gamma}$  that effectively generalizes the  
227 Egger-regression assumption to correlated instruments. We also note that the joint generative  
228 Mendelian randomization model defined in equations (1) and (4) is a useful conceptual  
229 framework that unifies many existing MR methods. In particular, almost all existing MR  
230 methods are built upon the joint model, but with different modeling assumptions on  $\boldsymbol{\beta}$  and  $\boldsymbol{\gamma}$ , and  
231 with different inference procedures (Table 1). Compared with these existing MR approaches,  
232 PMR-Egger is capable of modeling multiple correlated instruments, effectively controls for  
233 horizontal pleiotropy, and places inference into a likelihood framework.

## 234 **Simulations**

235 We performed simulations to assess the performance of PMR-Egger and compare it with existing  
236 approaches. To do so, we first obtained 556 cis-SNPs for the gene *BACE1* on chromosome 11  
237 from the GEUVADIS data<sup>37</sup> (data processing details in the next section) and simulated gene  
238 expression values. We used the gene *BACE1* because the number of cis-SNPs in this gene  
239 represents the median of all genes. With the scaled genotype data  $\mathbf{Z}_x$ , we simulated SNP effect  
240 sizes  $\boldsymbol{\beta}$  from a normal distribution  $N(0, PVE_{zx}/556)$ , where the scalar  $PVE_{zx}$  represents the  
241 proportion of gene expression variance explained by genetic effects. We summed the genetic  
242 effects across all cis-SNPs as  $\mathbf{Z}_x\boldsymbol{\beta}$ . In addition, we simulated residual errors  $\boldsymbol{\epsilon}_x$  from a normal  
243 distribution  $N(0, 1 - PVE_{zx})$ . We then summed the genetic effects and residual errors to yield  
244 the simulated gene expression level.

245 Next, we obtained genotypes for the same 556 SNPs from 2,000 randomly selected control  
246 individuals in the Kaiser Permanente/UCSF Genetic Epidemiology Research Study on Adult  
247 Health and Aging (GERA)<sup>38,39</sup> and simulated a quantitative trait. Here, we directly used  $\boldsymbol{\beta}$  from

248 the gene expression data, which, when paired with the causal effect  $\alpha$ , yielded the vertical  
249 pleiotropic effects  $\alpha\beta$ . We set  $\alpha = \sqrt{PVE_{zy}/PVE_{zx}}$ , and we simulated residual errors  $\epsilon_y$  from a  
250 normal distribution  $N(0, 1 - PVE_{zy})$ . Here, the scalar parameter  $PVE_{zy}$  represents the proportion  
251 of phenotypic variance explained by vertical pleiotropic effects in the absence of horizontal  
252 pleiotropic effects. Afterwards, we simulated horizontal pleiotropic effects  $\gamma$  for these SNPs  
253 (more details below). We summed the horizontal pleiotropic effects, vertical pleiotropic effects  
254 and residual errors to yield the simulated trait.

255 In the simulations, we first examined a baseline simulation setting where we set  $PVE_{zx} =$   
256 10%,  $PVE_{zy} = 0$ , with all  $\gamma_j = 0$ . On top of the baseline setting, we varied one parameter at a  
257 time to examine the influence of various parameters. For  $PVE_{zx}$ , we set it to be either 1%, 5% or  
258 10%, close to the median gene expression heritability estimates across genes<sup>40,41</sup>. For  $\beta$ , we  
259 examined alternative SNP effect size distributions that deviate from the polygenic assumption in  
260 the baseline setting. Specifically, we randomly selected either 1 SNP, 1%, 10% or 100% of the  
261 SNPs to have non-zero effect, while simulated their effects from a normal distribution to explain  
262 a fixed  $PVE_{zx}$ . For  $PVE_{zy}$ , we varied its value to be either 0% (for null simulations), 0.2%, 0.4%  
263 or 0.6% (for power simulations). For the horizontal pleiotropy effects  $\gamma$ , we randomly assigned a  
264 fixed proportion of  $\gamma_j$  to be non-zero (proportion equals 10%, 30%, 50%, or 100%). Afterwards,  
265 we set the absolute value of non-zero  $\gamma_j$  to be the same value of  $\gamma$ . As a sensitivity analysis, we  
266 also randomly assigned some of their signs to be positive and some of their signs to be negative,  
267 with the ratio of positive effects to negative effects being either 1:9, 3:7, or 5:5. Here, we set  $\gamma$  to  
268 be  $1 \times 10^{-4}$ ,  $5 \times 10^{-4}$ ,  $1 \times 10^{-3}$  or  $2 \times 10^{-3}$ , which corresponds to the 50%, 70%, 90%, 95%  
269 quantiles of horizontal pleiotropic effect estimates across all genes and all traits in the WTCCC  
270 data (more details below), respectively. For null simulations and type I error control examination,

271 we performed 10,000 simulation replicates for each simulation scenario described above. For  
272 power calculation, for each scenario, we performed 1,000 alternative simulations together with  
273 9,000 null simulations and calculated power based on false discovery rate (FDR).

274 While we applied PMR-Egger to analyze individual-level data from all simulations, we also  
275 applied PMR-Egger to analyze summary statistics in a subset of simulations to validate the  
276 implementation of the summary statistics based PMR-Egger algorithm. These results are  
277 presented in the Discussion section. Here, we considered the simulation settings with a fixed  
278 sample size ( $n_1 = 465, n_2 = 2,000$ ), different causal effect sizes ( $PVE_{zy} = 0$  or 0.6%) and  
279 different pleiotropy effect sizes ( $\gamma = 0$  or 0.0005). In the analysis, we calculated the LD matrix  
280 in the eQTL data using the observed individual-level genotypes in the eQTL study. We  
281 calculated the LD matrix in the GWAS data from a reference panel. The reference panel is  
282 constructed in three different ways, by using individual-level genotypes from either all  
283 individuals in the GWAS ( $n=2,000$ ), 10% of randomly selected individuals from the GWAS  
284 ( $n=200$ ), or the individuals with European ancestry from the 1,000 Genomes project ( $n=503$ ).

285 Besides the single gene-based simulations, we also conducted cross-gene simulations.  
286 Specifically, we randomly selected 10,000 genes from GEUVADIS. We extracted cis-SNPs for  
287 these 10,000 genes, obtaining a median of 576 cis-SNPs per gene (min=11; max=7,409). For  
288 each gene in turn, we used its cis-SNPs to simulate its gene expression level as described above.  
289 Afterwards, we applied different methods to analyze simulated data. The cross-gene based  
290 simulations reflect the varying LD pattern and the varying number of cis-SNPs across genes that  
291 we observe in real data, and thus are likely to be realistic than the single gene-based simulations.  
292 We performed cross-gene simulations under all simulation settings described above, including

293 settings with varying gene expression heritability, varying genetic architectures underlying gene  
294 expression, as well as varying causal and horizontal pleiotropy effects.

### 295 **Real Data Applications**

296 We applied our method to perform TWAS by integrating gene expression data with several  
297 GWASs. Specifically, we obtained GEUVADIS data<sup>37</sup> as the gene expression data and examined  
298 39 phenotypes from three GWASs. The three GWASs include the Wellcome trust case control  
299 study (WTCCC)<sup>42</sup>, the Kaiser Permanente/UCSF Genetic Epidemiology Research Study on  
300 Adult Health and Aging (GERA)<sup>38,39</sup>, and the UK Biobank<sup>43</sup>.

301 The GEUVADIS data<sup>37</sup> contains gene expression measurements for 465 individuals collected  
302 from five different populations that include CEPH (CEU), Finns (FIN), British (GBR), Toscani  
303 (TSI) and Yoruba (YRI). In the expression data, we only focused on protein coding genes and  
304 lincRNAs that are annotated in GENCODE (release 12)<sup>44,45</sup>. Among these genes, we removed  
305 lowly expressed genes that have zero counts in at least half of the individuals to obtain a final set  
306 of 15,810 genes. We performed PEER normalization to remove confounding effects and  
307 unwanted variations following previous studies<sup>19,46</sup>. Afterwards, following<sup>19</sup>, to remove  
308 remaining population stratification, we quantile normalized the gene expression measurements  
309 across individuals in each population to a standard normal distribution, and then further quantile  
310 normalized the gene expression measurements to a standard normal distribution across  
311 individuals from all five populations. Besides expression data, all individuals in GEUVADIS  
312 also have their genotypes sequenced in the 1,000 Genomes Project. We obtained genotype data  
313 from the 1,000 Genomes Project phase 3. We filtered out SNPs that have a Hardy-Weinberg  
314 equilibrium (HWE) p-value  $< 10^{-4}$ , a genotype call rate  $< 95\%$ , or a minor allele frequency (MAF)  
315  $< 0.01$ . We retained a total of 7,072,917 SNPs for analysis.

316 The WTCCC data consists of about 14,000 cases from seven common diseases and 2,938  
317 shared controls<sup>42</sup>. The diseases include type 1 diabetes (T1D;  $n=1,963$ ), Crohn's disease (CD;  
318  $n=1,748$ ), rheumatoid arthritis (RA;  $n=1,861$ ), bipolar disorder (BD;  $n=1,868$ ), type 2 diabetes  
319 (T2D;  $n=1,924$ ), coronary artery disease (CAD;  $n=1,926$ ), and hypertension (HT;  $n=1,952$ ). We  
320 obtained quality controlled genotypes from WTCCC and initially imputed missing genotypes  
321 using BIMBAM<sup>47</sup> to arrive at a total of 458,868 SNPs shared across all individuals. Afterwards,  
322 we further imputed SNPs using the 1,000 Genomes as the reference panel using SHAPEIT and  
323 IMPUTE2<sup>48</sup>. We filtered out SNPs that have an HWE p-value  $< 10^{-4}$ , a genotype call rate  $< 95\%$ ,  
324 or an MAF $< 0.01$  to obtain a total of 2,793,818 imputed SNPs. For each trait in turn, we first  
325 regressed the phenotype on the top 10 genotype principal components (PCs) and obtained  
326 phenotype residuals. We then scaled the phenotype residuals to have a mean of zero and standard  
327 deviation of one and used these phenotype residuals for TWAS analysis. In addition to the main  
328 analysis that uses phenotype residuals, we also performed parallel analysis with PMR-Egger  
329 where we used the original phenotype as the outcome variable and the top 10 genotype PCs as  
330 covariates.

331 The GERA study consists of 61,953 individuals and 675,367 genotyped SNPs. We filtered out  
332 SNPs that had a genotype calling rate below 0.95, MAF $< 0.01$ , or HWE p value $< 10^{-4}$  to yield a  
333 total of 487,609 SNPs. We phased genotypes using SHAPEIT<sup>49</sup> and imputed SNPs based on the  
334 Haplotype Reference Consortium (HRC version r1.1) reference panel<sup>50</sup> on the Michigan  
335 Imputation Server using Minimac3<sup>51</sup>. Afterwards, we further filtered out SNPs that have a HWE  
336 p-value  $< 10^{-4}$ , a genotype call rate  $< 95\%$ , an MAF $< 0.01$ , or an imputation score $< 0.30$  to arrive  
337 at a total of 8,385,867 SNPs that are shared across 61,953 individuals. We examined 22 diseases  
338 in GERA that include Asthma (number of cases  $n=10,101$ ), Allergic Rhinitis ( $n=15,193$ ),



339 Cardiovascular Disease (CARD, n=16,431), Cancers (n=18,714), Depressive Disorder (n=7,900),  
340 Dermatophytosis (n=8,443), Type 2 Diabetes (T2D, n=7,638), Dyslipidemia (n=33,071),  
341 Hypertension (HT, n=31,044), Hemorrhoids (n=9,922), Abdominal Hernia (n=6,876), Insomnia  
342 (n=4,357), Iron Deficiency (n=2,706), Irritable Bowel Syndrome (n=3,367), Macular  
343 Degeneration (n=4,031), Osteoarthritis (n=22,062), Osteoporosis (n=5,909), Peripheral Vascular  
344 Disease (PVD, n=4,718), Peptic Ulcer (n=1,007), Psychiatric disorders (n=9408), Stress  
345 Disorders (n=4,706), and Varicose Veins (n=2,714). For each trait in turn, we first regressed the  
346 phenotype on the top 10 genotype principal components (PCs) and obtained phenotype residuals.  
347 We then scaled the phenotype residuals to have a mean of zero and standard deviation of one and  
348 used these phenotype residuals for TWAS analysis. In addition to the main analysis that uses  
349 phenotype residuals, we also performed parallel analysis with PMR-Egger where we used the  
350 original phenotype as the outcome and the top 10 genotype PCs as covariates.

351 The UK Biobank data consists of 487,409 individuals and 92,693,895 imputed SNPs<sup>43</sup>. We  
352 followed the same sample QC procedure in Neale lab  
353 ([https://github.com/Nealelab/UK\\_Biobank\\_GWAS/tree/master/imputed-v2-gwas](https://github.com/Nealelab/UK_Biobank_GWAS/tree/master/imputed-v2-gwas)) to retain a  
354 total of 337,198 individuals of European ancestry. We filtered out SNPs with an HWE p-value <  
355  $10^{-7}$ , a genotype call rate <95%, or an MAF<0.001 to obtain a total of 13,876,958 SNPs. We  
356 selected 10 UK Biobank quantitative traits that have a phenotyping rate > 80%, a SNP  
357 heritability > 0.2 and a low correlation among them following a previous study<sup>52</sup>. The 10 traits  
358 include Height ( $h^2 = 0.579$ ), Platelet count ( $h^2 = 0.404$ ), Bone mineral density ( $h^2 = 0.401$ ),  
359 Red blood cell count ( $h^2 = 0.324$ ), FEV1-FVC ratio ( $h^2 = 0.313$ ), Body mass index (BMI,  
360  $h^2 = 0.308$ ), RBC distribution width ( $h^2 = 0.288$ ), Eosinophils count ( $h^2 = 0.277$ ), Forced  
361 vital capacity ( $h^2 = 0.277$ ), White blood cell count ( $h^2 = 0.272$ ). For each trait in turn, we

362 regressed the resulting standardized phenotypes on sex and top 10 genotype principal  
363 components (PCs) to obtain the residuals, standardized the residuals to have a mean of zero and a  
364 standard deviation of one, and finally used these scaled residuals to conduct TWAS analysis. We  
365 also performed parallel analysis with PMR-Egger by including the top 10 genotype PCs as  
366 covariates.

367 We combined the GEUVADIS data with each of the three GWASs for TWAS analysis. To do  
368 so, in the GEUVADIS data, for each gene in turn, we extracted cis-SNPs that are within either  
369 100 kb upstream of the transcription start site (TSS) or 100 kb downstream of the transcription  
370 end site (TES). We overlapped these SNPs in GEUVADIS with the SNPs obtained from each of  
371 the three GWASs to obtain common sets of SNPs. The median number of the overlapped cis-  
372 SNPs between GEUVADIS and WTCCC, GERA or UK Biobank are 200, 556 or 500,  
373 respectively. Afterwards, for each pair of gene (from GEUVADIS) and trait (from GWAS) in  
374 turn, we examined the causal relationship between gene expression and trait of interest while  
375 testing and controlling for potential horizontal pleiotropic effects.

### 376 **Compared Methods**

377 For testing the causal effect, we compared the performance of PMR-Egger with five existing  
378 methods that include: (1) SMR, which uses a single instrument and does not control for  
379 horizontal pleiotropy. For SMR, we first performed a linear regression to choose the top  
380 associated cis-SNP to be the instrumental variable. (2) PrediXcan, which uses multiple correlated  
381 instruments but does not control for horizontal pleiotropy. For PrediXcan, we used all cis-SNPs  
382 for the model and used ElasticNet implemented in the R package glmnet to obtain the coefficient  
383 estimates for the cis-SNPs. (3) TWAS, which uses multiple correlated instruments but does not  
384 control for horizontal pleiotropy. For TWAS, we used all cis-SNPs for the model and used

385 BSLMM<sup>53</sup> implemented in the GEMMA software<sup>54</sup> to obtain coefficient estimates for the cis-  
386 SNPs. (4) CoMM, which uses multiple correlated instruments but does not control for horizontal  
387 pleiotropy. We used all cis-SNPs for the model and used the R package CoMM for model fitting.  
388 (5) LDA MR-Egger, which uses multiple correlated instruments and controls for horizontal  
389 pleiotropy. We used all cis-SNPs for the model and contacted the authors of LDA MR-Egger to  
390 obtain the method source code. All these methods are suitable for two-sample design and yield  $p$   
391 values for testing the causal effect  $\alpha$ . Note that PrediXcan, TWAS and CoMM are not originally  
392 described as an MR method but conceptually rely on the same joint MR model based on  
393 equations (1) and (4). These three methods differ in their prior assumptions on  $\beta$ : PrediXcan  
394 relies on ElasticNet assumption; TWAS relies on BSLMM<sup>53</sup> assumption; while CoMM relies on  
395 the normal prior assumption. In addition, PrediXcan and TWAS rely on a two-stage regression  
396 procedure while CoMM is based on maximum likelihood. We were unable to compare our  
397 method with either GSRM or the standard Egger regression, as both require multiple independent  
398 SNP instruments that are generally not feasible to obtain in TWAS applications.

399 Again, we used all cis-SNPs for methods that can make use of multiple correlated instruments  
400 (i.e. PMR-Egger, TWAS, PrediXcan, CoMM, and LDA MR Egger). We performed a linear  
401 regression to select the top associated cis-SNP as the instrumental variable for SMR, as it can  
402 only use a single instrument. In all simulations and real data applications, methods that can use  
403 either individual-level data or summary statistics (PMR-Egger, PrediXcan and TWAS) are  
404 applied using individual-level data as input to ensure their optimal performance. Methods that  
405 can only use individual-level data (CoMM) are applied using individual-level data as input.  
406 Methods that can only use summary statistics (SMR and LDA MR-Egger) are applied using

407 summary data as input. For PMR-Egger, we used individual-level data for all main analyses and  
408 used summary data for a subset of analyses that are described in the Discussion section.

409 Besides the above methods, we also compared different methods to a recently published fine-  
410 mapping TWAS method, FOCUS<sup>55</sup>. In the FOCUS analysis, we followed<sup>55</sup> and obtained a set of  
411 independent non-overlapping genomic regions termed as LD blocks from LDetect<sup>56</sup>. We  
412 removed genomic regions that overlap with the MHC region due to the extensive LD structure.  
413 Following<sup>55</sup>, we also focus our analysis on a subset of regions that harbor at least one genome-  
414 wide-significant SNP ( $p < 5 \times 10^{-8}$ ; the default threshold used in FOCUS), and for each  
415 TWAS/MR method (i.e. PMR-Egger, TWAS, PrediXcan, CoMM, or SMR), also harbor at least  
416 one TWAS gene that is declared significant by the given method. We then applied FOCUS to  
417 analyze these remaining regions and identify genes that are in the 90% credible set.

418 For testing horizontal pleiotropic effect, we compared the performance of PMR-Egger with  
419 two existing methods that include (1) LDA MR-Egger; and (2) the global test in MR-PRESSO,  
420 which is implemented as an R package. Both these methods examine one gene at a time and  
421 output a  $p$  value for testing horizontal pleiotropic effects.

422

## 423 **Results**

424 Our method is described in the [Methods](#) (inside the method overview subsection there), with  
425 technical details provided in the [Supplementary Note](#). For TWAS applications, our method  
426 examines one gene at a time and estimates and tests its causal effect on a trait of interest. Our  
427 method models multiple correlated instruments, performs MR inference in a maximum  
428 likelihood inference framework, and is capable of testing and controlling for horizontal  
429 pleiotropic effects commonly encountered in TWAS. We refer to our method as the probabilistic  
430 Mendelian randomization with Egger regression (PMR-Egger), which is implemented as an R  
431 package. Our method is computationally efficient and can analyze each gene in minutes in a  
432 GWAS with a few hundred thousand individuals ([Table 2](#)).

### 433 **Simulations: Testing and estimating the causal effect**

434 We performed simulations to examine the effectiveness of our method and compared it with  
435 existing MR approaches. Simulation details are provided in the [Methods](#). Briefly, we simulated  
436 gene expression values based on genotypes from 456 individuals in GEUVADIS and simulated  
437 phenotypes based on genotypes from 2,000 randomly selected individuals in GERA. In the  
438 simulations, we varied the genetic architecture underlying gene expression from sparse (one SNP  
439 or 1% of SNPs are causal) to polygenic (10% or 100% of SNPs are causal). We varied the  
440 proportion of SNPs exhibiting horizontal pleiotropic effects in a wide range (from 0%, 10%,  
441 30%, 50% to 100%). We examined directional pleiotropy setting (the ratio of SNPs with  
442 negative vs positive horizontal pleiotropic effects is 0:10), approximately directional pleiotropy  
443 setting (1:9 or 3:7) and balanced pleiotropy settings (5:5). We varied the magnitude of horizontal  
444 pleiotropic effects  $\gamma$  to be either  $1 \times 10^{-4}$ ,  $5 \times 10^{-4}$ ,  $1 \times 10^{-3}$ , or  $2 \times 10^{-3}$ , which corresponds to the 50%,  
445 70%, 90%, 95% percentiles of the horizontal pleiotropic effect estimate in real data. We also

446 varied the magnitude of causal effect  $\alpha$  to be either 0, 0.14, 0.2 or 0.245, which corresponds to a  
447 proportion of phenotypic variance explained by vertical pleiotropic effects ( $PVE_{zy}$ ) as 0, 0.2%,  
448 0.4% and 0.6% respectively.

449 Our first set of simulations is focused on causal effect testing. Here, we compared PMR-Egger  
450 with five different methods that include SMR, PrediXcan, TWAS, CoMM, and LDA MR-Egger.  
451 We first examined type I error control of different methods under the null ( $\alpha = 0$ ). In the  
452 absence of horizontal pleiotropic effects, PMR-Egger, together with PrediXcan, TWAS, and  
453 CoMM, all provides calibrated type I error (Fig. 1a). Consistent with previous observations<sup>57</sup>, we  
454 found that SMR produces overly-conservative/deflated p-values. The deflation of SMR p-values  
455 is presumably because SMR requires the selected instrument being a true causal SNP with a  
456 large effect size, which is not always guaranteed in practice. In addition, we found that LDA  
457 MR-Egger produces inflated p-values, presumably because LDA MR-Egger makes a fixed effect  
458 assumption on  $\beta$ . The fixed effect assumption on  $\beta$  is not expected to work well in TWAS  
459 settings where the number of SNPs are on the same order of the sample size in the gene  
460 expression study and where the cis-SNPs are all highly correlated with each other due to LD.  
461 Such fixed effect assumption on  $\beta$ , when paired with the two-stage inference procedure that  
462 ignores the estimation uncertainty in the first stage, makes LDA MR-Egger sensitive to the  
463 collinearity induced by SNP correlations caused by LD. Indeed, we found that the p-values from  
464 LDA MR-Egger are well calibrated when we followed the exact same simulation setting used  
465 in<sup>33</sup>, where SNP genotypes were simulated based on an autoregressive covariance matrix with a  
466 moderate correlation parameter. However, when such correlation parameter was set to be  
467 realistically high (>0.9) or if we used SNPs from real data to carry out the same set of  
468 simulations, then we observed p-value inflation from LDA MR-Egger (Supplementary Fig. 2).

469 In the presence of horizontal pleiotropic effects, PMR-Egger becomes the only method that  
470 produces calibrated (or slightly conservative) p-values (Fig. 1b, c, d). In contrast, the p-values  
471 from all other methods become inflated, and more so with increasingly large horizontal  
472 pleiotropic effect. For example, when  $\gamma$  is  $5 \times 10^{-4}$ , the genomic control factors from PMR-Egger,  
473 SMR, PrediXcan, TWAS, CoMM, and LDA MR-Egger are 0.93, 1.30, 1.33, 1.33, 1.49 and 2.61  
474 respectively. When  $\gamma$  is increased to  $1 \times 10^{-3}$ , the genomic control factors from PMR-Egger, SMR,  
475 PrediXcan, TWAS, CoMM, and LDA MR-Egger become 0.93, 2.39, 2.27, 2.46, 4.03 and 2.57  
476 respectively.

477 The null p-value distributions from different methods remain largely similar regardless of the  
478 genetic architecture underlying gene expression being sparse or polygenic (Supplementary Fig.  
479 3). Note that, the p-values from SMR become less deflated when there is a sparse set of SNPs  
480 affecting gene expression; however, such deflation is not completely abolished even when one  
481 SNP has non-zero effect on gene expression, presumably because we cannot always identify the  
482 true non-zero effect SNP through eQTL mapping and may supply a tagged SNP for SMR  
483 analysis. In addition, the p-value distribution pattern for different methods under the null does  
484 not change much with reduced the gene expression heritability value  $PVE_{zx}$ . When  $PVE_{zx}$  is  
485 either 5% or 1%, PMR-Egger still produces well-calibrated  $p$  values (Supplementary Fig. 4).

486 We note that, like the standard MR-Egger regression, our PMR-Egger also makes a relatively  
487 strong assumption on the horizontal pleiotropic effect and assumes that all SNPs have the same  
488 horizontal pleiotropic effect. To examine the robustness of such assumption, besides the above  
489 settings where either 0% or 100% SNPs have horizontal pleiotropic effects, we varied the  
490 proportion of horizontal pleiotropic SNPs to be either 10%, 30%, 50%. We found that the p-  
491 values from PMR-Egger remain calibrated regardless of the sparsity of the horizontal pleiotropic

492 SNPs ([Supplementary Fig. 5](#)). In addition, besides the above directional pleiotropy settings  
493 where the ratio of SNPs with negative vs positive effects is set to be 0:10, we also examined two  
494 approximately directional pleiotropy settings (1:9 or 3:7) and one balanced setting (5:5). We  
495 found that the p-values from PMR-Egger remains calibrated in either the approximately  
496 directional pleiotropy settings or the balanced setting when horizontal pleiotropic effect is small  
497 or moderate ( $\gamma = 1 \times 10^{-4}$ ,  $5 \times 10^{-4}$ , or  $1 \times 10^{-3}$ ; [Supplementary Fig. 6a, b, c](#)). However, when  
498 horizontal pleiotropic effect is large ( $\gamma = 2 \times 10^{-3}$ ), as one would expect, the p-values from PMR-  
499 Egger becomes inflated, with genomic control factor being 1.08, 1.31 and 1.37, for settings  
500 where the ratio is 1:9, 3:7 and 5:5, respectively ([Supplementary Fig. 6d](#)). Finally, we repeated all  
501 the above analyses with cross-gene based simulations, which provide consistent results on the  
502 type I error control of different methods for testing the causal effects ([Supplementary Fig. 7-12](#)).

503 Next, we examined the power of different methods to identify the causal effect for a range of  
504 possible causal effect sizes  $\alpha$ . Because the same p-value from different methods may correspond  
505 to different type I errors, we computed power based on FDR of 0.1 instead of a nominal p-value  
506 threshold to allow for fair comparison across methods. In the absence of horizontal pleiotropic  
507 effects or in the presence of small horizontal pleiotropic effects, PMR-Egger, TWAS and CoMM  
508 have similarly power, all outperforming the other three methods, highlighting the importance of  
509 making polygenic assumptions on  $\beta$  and modeling all cis-SNPs together ([Fig. 2a, b](#)). The power  
510 of PMR-Egger is slightly lower than the other two, presumably because PMR-Egger uses extra  
511 parameters to model horizontal pleiotropy, which leads to a loss of degrees of freedom and  
512 subsequent loss of power in the absence of horizontal pleiotropy. The power of all methods  
513 increases with  $\alpha$ , though their relative performance rank does not change. In the presence of  
514 horizontal pleiotropy, the power of all methods reduces ([Fig. 2c, d](#)). However, the power



515 reduction from PMR-Egger is substantially smaller than all other methods. For example, when  
516  $PVE_{zy} = 0.006$  and  $\gamma = 0.0005$ , PMR-Egger reaches a power of 41%; the power of SMR,  
517 PrediXcan, TWAS, CoMM, and LDA MR-Egger are 7%, 24%, 31%, 33% and 1%, respectively.  
518 When  $PVE_{zy} = 0.006$  but  $\gamma = 0.001$ , the power of PMR-Egger remains similar and is 40%; the  
519 power of SMR, PrediXcan, TWAS, CoMM, and LDAMR-Egger reduces to 3%, 13%, 16%, 16%  
520 and 0.9%, respectively. Besides the horizontal pleiotropic effects  $\boldsymbol{\gamma}$ , we examined how power is  
521 influenced by the genetic architecture underlying gene expression,  $\boldsymbol{\beta}$  (Supplementary Fig. 13).  
522 We found that the power of different methods in the setting where 10% of SNPs have non-zero  
523 effects on gene expression are similar to the baseline setting where all SNPs have non-zero  
524 effects, both in the absence (Supplementary Fig. 13e vs Fig. 2a) or in the presence of horizontal  
525 pleiotropic effects (Supplementary Fig. 13f vs Fig. 2d). However, the relative performance of  
526 different methods changes when there is only one SNP or 1% SNPs having non-zero effect on  
527 gene expression. Specifically, in the absence of horizontal pleiotropic effects, the power of both  
528 PrediXcan and SMR become slightly higher than PMR-Egger, TWAS and CoMM, all of which  
529 have substantially higher power than LDA MR-Egger (Supplementary Fig. 13a, c). The higher  
530 power of PrediXcan and SMR in the sparse setting presumably is because the ElasticNet  
531 estimation procedure employed in PrediXcan favors sparse eQTLs while SMR explicitly makes a  
532 single eQTL assumption. In the presence of horizontal pleiotropic effects, however, PMR-Egger  
533 remains the most powerful, even in the setting where only one SNP has non-zero effect on gene  
534 expression (Supplementary Fig. 13b, d). We also found that PMR-Egger produces accurate  
535 estimate of the causal effect  $\alpha$ , both under the null and under various alternatives, in the presence  
536 or absence of horizontal pleiotropic effects (Supplementary Fig. 14). The causal effect estimates  
537 remain reasonably unbiased in the two approximately directional pleiotropy settings and one

538 balanced setting (Supplementary Fig. 15a, c, e). Finally, we repeated all the above analyses in  
539 cross-gene based simulations, which provide consistent results on the power of different methods  
540 for detecting causal effects (Supplementary Fig. 16-17).

#### 541 **Simulations: Testing and estimating horizontal pleiotropic effect**

542 Our second set of simulations is focused on horizontal pleiotropic effect testing. Here, we  
543 compared PMR-Egger with two different methods: LDA MR-Egger and MR-PRESSO. All three  
544 methods examine one gene at a time and test whether cis-SNPs within the gene exhibit non-zero  
545 horizontal pleiotropic effects. Note that, unlike PMR-Egger and LDA MR-Egger, MR-PRESSO  
546 requires independent instruments and uses permutation to obtain the empirical p-values. Due to  
547 the heavy computational burden resulting from permutations, we restricted the number of  
548 permutations in MR-PRESSO to 10,000 (the lowest possible p value from MR-PRESSO is thus  
549  $10^{-4}$ ) and were only able to apply MR-PRESSO to a subset of simulation scenarios.

550 We first examined type I error control of different methods under the null, where there is no  
551 horizontal pleiotropic effect. We found that the p-values from PMR-Egger provide calibrated  
552 type I error control under a range of causal effect sizes  $\alpha$  (Fig. 3). However, p-values from both  
553 LDA MR-Egger and MR-PRESSO are inflated, and more so with increasingly large causal effect  
554  $\alpha$ . For example, when  $PVE_{zy} = 0$ , the genomic control factor from PMR-Egger and LDA MR-  
555 Egger are 0.96 and 2.31, respectively. When  $PVE_{zy}$  is increased to 0.6%, the genomic control  
556 factor from PMR-Egger remains 0.96, while the genomic control factor from LDA MR-Egger  
557 becomes 3.04. (We are unable to accurately compute the genomic control factor for MR-  
558 PRESSO because its minimal p-value is  $10^{-4}$ .) The overly inflated p-values from LDA MR-Egger  
559 is presumably due to its fixed effect modeling assumption on  $\beta$  and the subsequent failure to  
560 control for realistic LD patterns. The inflation of MR-PRESSO p values is presumably because

561 MR-PRESSO can only handle independent instruments and thus does not fare well in TWAS  
562 settings. Inflation of p-value on testing horizontal pleiotropy would incorrectly identify genes  
563 with no pleiotropic effects, thus likely reducing the power to detect true causal effect  $\alpha$ .  
564 Importantly, the p-values from PMR-Egger remain calibrated regardless of the genetic  
565 architecture underlying gene expression (Supplementary Fig. 18). Finally, we repeated all the  
566 above analyses in cross-gene based simulations, which provide consistent results on the type I  
567 error control of different methods for testing pleiotropic effects (Supplementary Fig. 19-20).

568 Next, we examined the power of different methods in detecting non-zero horizontal  
569 pleiotropic effect. Again, we computed power based on an FDR of 0.1 instead of the nominal p-  
570 value to allow for fair comparison across methods. We dropped MR-PRESSO for comparison  
571 here due to its heavy computational burden. We found that PMR-Egger outperforms LDA MR-  
572 Egger in a range of possible horizontal pleiotropic effect sizes, and that the power of both  
573 methods increases with increasing horizontal pleiotropy (Fig. 2e, f). For example, when  $PVE_{zy} =$   
574 0.6% and  $\gamma = 0.0005$ , PMR-Egger achieves a power of 1.6% while LDA MR-Egger achieves a  
575 power of 1% (note that the power is relatively small due to the small sample size used in the  
576 simulations). When  $PVE_{zy} = 0.6\%$  but  $\gamma = 0.001$ , the power of PMR-Egger increases to 58.9%  
577 while the power of LDA MR-Egger increases to 32%. In addition, the power to detect horizontal  
578 pleiotropic effects is not influenced by the sparsity level of the genetic architecture underlying  
579 gene expression (Supplementary Fig. 21). The power to detect horizontal pleiotropic effects does,  
580 however, depend on the sparsity level of  $\gamma$  (Supplementary Fig. 22a). Specifically, power of both  
581 PMR-Egger and LDA MR-Egger reduces with increasing sparsity of  $\gamma$ , though the power of  
582 PMR-Egger remains higher than LDA MR-Egger across a range of sparsity values. Similarly, the  
583 power to detect pleiotropic effects also suffers in the absence of directional pleiotropic effect

584 (Supplementary Fig. 22b). In addition, PMR-Egger can estimate the horizontal pleiotropic effect  
585 size accurately in the presence of directional pleiotropic effect (Supplementary Fig. 23).  
586 However, in the absence of directional pleiotropic effect, as one would expect, the estimates of  
587 pleiotropic effects become under-ward biased, more so in the balanced setting than in the  
588 approximately directional pleiotropy settings (Supplementary Fig. 15b, d, f). Finally, we repeated  
589 all the above analyses in cross-gene based simulations, which provide consistent results on the  
590 power of different methods for detecting pleiotropic effects (Supplementary Fig. 24-25).

### 591 **Real data applications**

592 We performed TWAS to detect genes causally associated with any of the 39 phenotypes  
593 collected from three GWASs (details in Methods). The examined gene expression data is  
594 obtained from the GEUVADIS study and contains 15,810 genes. The examined phenotypes  
595 include 7 common diseases from WTCCC, 22 diseases from GERA, and 10 quantitative traits  
596 from UK Biobank. The GWAS sample size ranges from 4,686 (for Crohn's disease in WTCCC)  
597 to 337,198 (for UK Biobank). We applied PMR-Egger together with five other approaches (SMR,  
598 PrediXcan, TWAS, CoMM, and LDA MR-Egger) to examine pairs of gene and phenotype one at  
599 a time. In the analysis, we regressed phenotypes on the top 10 genotyping PCs to obtain the  
600 phenotype residuals, which we used further to conduct TWAS analysis for all compared methods.  
601 The p-values for testing the causal effect of each gene on the phenotype are shown for WTCCC  
602 traits (Fig. 4a, b and Supplementary Fig. 26), GERA traits (Fig. 5a, b and Supplementary Fig.  
603 27), and UK Biobank traits (Fig. 6a, b and Supplementary Fig. 28); with genomic control factors  
604 listed in Supplementary Table 1 and visualized in Fig. 4c, Fig. 5c and Fig. 6c. Besides these main  
605 analyses, we also performed parallel analysis for PMR-Egger where we used the original  
606 phenotype as the outcome and included the top 10 genotype PCs as covariates (Supplementary

607 [Figures 29-31](#)). The results from these parallel analyses are largely consistent with the main  
608 results. Therefore, we will mainly report the main results in the following text. For illustration  
609 purpose, we display qq-plots for two selected traits in each data, one with a relatively low  
610 number of gene associations and the other with a relatively high number of gene associations, in  
611 [Fig. 4a, b](#), [Fig. 5a, b](#) and [Fig. 6a, b](#), respectively. Among the selected six traits, the one with zero  
612 number of associated genes (BD in WTCCC; [Fig. 4a](#)) and the one with one associated gene  
613 (Irritable Bowel Syndrome in GERA; [Fig. 5a](#)), represent approximately null traits with no  
614 apparently associated genes. For the six selected traits, consistent with simulations, we found that  
615 the p-values from PMR-Egger are well calibrated, more so than the other methods. In contrast,  
616 the p-values from CoMM, TWAS, PrediXcan and LDA MR-Egger are inflated and deviated  
617 upward from the diagonal line, while the p-values from SMR are overly conservative and lie  
618 below the diagonal line. The results observed in these exemplary traits generalize to all other  
619 examined traits. For example, the genomic control factor from PMR-Egger is the lowest among  
620 all methods in 25 out of the 39 traits, and ranges from 0.93 to 1.04 in WTCCC ([Fig. 4c](#)), from  
621 0.92 to 1.13 in GERA ([Fig. 5c](#)), and from 1.12 to 1.34 in UK Biobank ([Fig. 6c](#)). (Note that the  
622 higher genomic control factor in the large UK Biobank as compared to WTCCC and GERA is  
623 expected under polygenic architecture<sup>58</sup> and reflects at least in part the higher power in the UK  
624 Biobank as compared to GERA and WTCCC.) In contrast, the genomic control factors from  
625 CoMM, TWAS, PrediXcan are often higher than that from PMR-Egger for most traits examined.  
626 For example, the genomic control factor from CoMM is often the highest among all other  
627 methods (except for LDA MR-Egger) in 22 out of the 39 traits, and ranges from 1.13 to 1.23 in  
628 WTCCC, 0.94 to 1.62 in GERA, and 1.45 to 1.90 in UK Biobank. The genomic control factor  
629 from TWAS is the highest among all other methods (except for LDA MR-Egger) in 14 out of the

630 39 traits, ranges from 1.20 to 1.31 in WTCCC, 0.98 to 1.15 in GERA, and 1.30 to 2.17 in UK  
631 Biobank. The genomic control factor from PrediXcan is the highest among all other methods  
632 (except for LDA MR-Egger) in 5 out of the 39 traits, and ranges from 1.21 to 1.31 in WTCCC,  
633 1.00 to 1.16 in GERA, and 1.09 to 1.46 in UK Biobank. In addition, consistent with simulations,  
634 we observed a substantial inflation of LDA MR-Egger p-values: its genomic control factor  
635 ranges from 17.60 to 18.56 in WTCCC, 32.13 to 34.74 in GERA, and 10.48 to 16.65 in UK  
636 Biobank. Also consistent with simulations, the p-value from SMR often lies underneath the  
637 expected null, even though its genomic control factors are often well behaved (Fig. 4a, b, Fig. 5a,  
638 b, Fig. 6a, b and Supplementary Figs. 26-28).

639 We examined the number of associated genes detected by different methods based on a  
640 Bonferroni corrected genome-wide threshold (Fig. 4d, Fig. 5d and Fig. 6d; Supplementary Table  
641 2). We note that the number of detected genes based on this p-value threshold may artificially  
642 favors those methods that have inflated type I error control. For this analysis, we excluded LDA  
643 MR-Egger for comparison, as its p-values are overly inflated. Comparing across the remaining  
644 methods, we found that SMR can barely detect any genes significantly associated with traits  
645 across all three data sets, much less so than that detected by the other four methods. The much  
646 lower number of genes detected by SMR than the other four methods are consistent with the  
647 relatively low power of SMR observed in simulations. For the other four methods, we found that  
648 the number of gene-trait pairs detected by CoMM and PMR-Egger is higher than that detected by  
649 TWAS and PrediXcan in all three GWASs (Fig. 4d, Fig. 5d and Fig. 6d; Supplementary Table 2).  
650 The higher number of discoveries by both CoMM and PMR-Egger in the three GWASs is  
651 consistent with our simulations as well as previous observations that likelihood-based inference  
652 often achieves higher power than two-stage inference for MR analysis. However, we do notice

653 that PMR-Egger detects slightly lower number of gene-trait pairs than CoMM based on the same  
654 genome-wide p-value threshold, consistent with the inflated genomic inflation factors observed  
655 for CoMM. Indeed, we found that the estimated  $|\frac{\alpha}{\gamma}|$  for the common set of genes detected by  
656 both CoMM and PMR-Egger is higher than the set of genes only detected by CoMM across traits  
657 (Supplementary Fig. 32a, b). Therefore, the genes detected by CoMM but not PMR-Egger tend  
658 to have large  $|\gamma|$  and small  $|\alpha|$ , likely reflecting false associations due to horizontal pleiotropic  
659 confounding.

660 Overall, by controlling for horizontal pleiotropic effects, PMR-Egger detected many likely  
661 causal genes that the other methods failed to detect. For example, the *LNK/SH2B3* gene  
662 (111,743,752-111,989,427 on chr 12) is only identified by PMR-Egger to be associated with  
663 platelet count in the UK Biobank (PMR-Egger  $p = 1.17 \times 10^{-221}$ ; CoMM  $p=0.98$ ; TWAS  $p =$   
664  $8.6 \times 10^{-5}$ ; PrediXcan  $p=0.68$ ; SMR  $p=0.024$ ). The association between *LNK* and plate count is  
665 consistent with results from recent large-scale GWASs<sup>59-61</sup>. *LNK/SH2B3* encodes the lymphocyte  
666 adaptor protein (LNK) that is primarily expressed in hematopoietic and endothelial cells<sup>62</sup>. In  
667 hematopoietic cells, LNK functions as a negative regulator of cell proliferation as well as the  
668 thrombopoietin-mediated cytokine signaling pathway, which is a key signaling pathway that  
669 promotes megakaryocytes to form platelets<sup>62,63</sup>. Indeed, platelets are overproduced and  
670 accumulated in *LNK* knockdown cells as well as *Lnk* knockout mouse<sup>64-66</sup>, supporting a causal  
671 role of *LNK* in platelets production. As the second example, the *NOD2* gene (50,627,514-  
672 50,866,988 on chr 16) is identified by PMR-Egger to be associated with Crohn's disease (CD;  
673  $p = 6.1 \times 10^{-19}$ ), and, with a slightly less significance, also by CoMM ( $p = 7.8 \times 10^{-15}$ ). The  
674 association between *NOD2* and CD was not identified by the other methods (TWAS  $p=0.005$ ;  
675 PrediXcan  $p=0.92$ ; SMR  $p=0.15$ ). *NOD2* encodes a cytosolic pattern recognition receptor that



676 acts both as a cytoplasmic sensor of microbial products and as an important mediator of innate  
677 immunity and inflammatory response<sup>67</sup>. The *NOD2* gene is a well-known susceptible gene for  
678 CD and is perhaps one of the first genes ever implied for CD<sup>68</sup>. Multiple SNPs in *NOD2* have  
679 been found to be associated with CD in both early linkage studies<sup>69-71</sup> and many recent  
680 GWASs<sup>72,73</sup>. *NOD2* variants associated with CD often reside in the ligand recognition domain of  
681 *NOD2* and can lead to aberrant bacterial handling and antigen presentation<sup>74</sup>. Indeed, *NOD2*-  
682 deficient mice displays dysregulated bacterial community in the ileum and *NOD2*-deficient ileal  
683 epithelia exhibit impaired ability of inducing immune responses for bacteria elimination<sup>75</sup>. It is  
684 thus hypothesized that mis-regulation of *NOD2* can causally lead to altered interactions between  
685 ileal microbiota and mucosal immunity, resulting in increased disease susceptibility to CD<sup>75</sup>. As  
686 a third example, the *TFRC* gene (195,654,054-195,909,060 on chr 3) is identified by PMR-Egger  
687 to be associated with red blood cell distribution width (RDW) in the UK Biobank ( $p = 3.3 \times$   
688  $10^{-17}$ ). Such association is not identified by the other methods (CoMM  $p=0.95$ ; TWAS  $p=0.76$ ;  
689 PrediXcan  $p=0.97$ ; SMR  $p=0.38$ ). *TFRC* encodes the classical transferrin receptor that is  
690 involved in cellular iron uptake<sup>76,77</sup>. Multiple SNPs in *TFRC* have been established to be  
691 associated with various erythrocyte phenotypes in GWASs<sup>78,79</sup>. These associated erythrocyte  
692 phenotypes include the mean corpuscular hemoglobin (MCH) and mean corpuscular volume  
693 (MCV, the average volume of red blood cells) which is directly related to RDW<sup>77,78</sup>. The variants  
694 in *TFRC* likely lead to decreased iron availability for red cell precursors, as has been observed in  
695 mice deficient in *TFRC*, thus resulting in a compensatory increase of red blood cell size as  
696 measured by RDW<sup>80</sup>. The regional association plots for all these three genes are presented in the  
697 [Supplementary Fig.33-35](#).



698 We compared the results from different MR methods with a recently published TWAS fine-  
699 mapping method, FOCUS<sup>55</sup>. The analysis details are provided in the [Materials and Methods](#)  
700 section. Briefly, we follow <sup>55</sup> and focused on independent and non-overlapping genomic regions  
701 that harbor at least one genome-wide-significant SNP and at least one TWAS gene that is  
702 significant by the MR methods. The number of genes and regions analyzed by FOCUS for each  
703 of the three data sets are shown in [Supplementary Table 3](#), which also contains the number of  
704 associated genes detected by FOCUS in the credible set. Due to the small number of associated  
705 genes detected in WTCCC, we focus our main comparison in GERA and UK Biobank. In these  
706 real data applications, we found that the results from PMR-Egger is largely consistent with that  
707 of FOCUS, more so than the other methods ([Supplementary Fig. 41](#)). Specifically, the average  
708 PMR-Egger  $-\log_{10}(\text{p-value})$  for genes in the FOCUS 90% credible set is 22.43 in GERA and  
709 10.67 in UK Biobank. The average  $-\log_{10}(\text{p-value})$  of PMR-Egger is higher than CoMM (13.83  
710 and 10.43), TWAS (5.71 and 7.55), PrediXcan (4.66 and 7.06) and SMR (NA for GERA, as no  
711 gene in the credible set is detected by SMR; 1.78 for UKbiobank). In addition, the difference of  
712 the average PMR-Egger  $-\log_{10}(\text{p-value})$  between genes in the FOCUS credible set and genes  
713 outside is large (16.61 in GERA and 7.43 in UK Biobank). The  $-\log_{10}(\text{p-value})$  difference is  
714 again larger than CoMM (8.41 and 6.02), TWAS (4.52 and 5.35), PrediXcan (3.50 and 4.74) and  
715 SMR (NA and 0.28). Similarly, the proportion of significant genes detected by PMR-Egger in  
716 the FOCUS credible set is 78% in GERA and 60% in UK Biobank. The proportion of significant  
717 genes by PMR-Egger is higher than CoMM (75% and 53%), TWAS (50% and 47%), PrediXcan  
718 (50% and 48%) and SMR (NA and 8%). In addition, the difference in the proportion of  
719 significant genes detected by PMR-Egger between genes in the FOCUS credible set and genes  
720 outside is high (53% in GERA and 41% in UK Biobank). This proportion difference by PMR-

721 Egger is again higher than CoMM (51% and 39%), TWAS (46% and 36%), PrediXcan (50% and  
722 35%) and SMR (NA and 1%). The consistency between PMR-Egger and FOCUS validates the  
723 high power of PMR-Egger.

724 Next, we shift our focus to testing horizontal pleiotropic effects. The p-values for testing the  
725 causal effect of gene on phenotype are shown for WTCCC traits (Fig. 4e, f and Supplementary  
726 Fig. 26), GERA traits (Fig. 5e, f and Supplementary Fig. 36), and UK Biobank traits (Fig. 6e, f  
727 and Supplementary Fig. 37); with genomic control factors visualized in Fig. 4g, Fig. 5g and Fig.  
728 6g. We also display qq-plots for the previously selected exemplary traits in Fig. 4e, f, Fig. 5e, f,  
729 and Fig. 6e, F. Overall, consistent with simulations, the p-values from PMR-Egger are well  
730 behaved while the p-value from LDA MR-Egger display substantial inflation. For example, the  
731 genomic control factor from PMR-Egger ranges from 0.93 to 1.01 in WTCCC (Fig. 4g), from  
732 0.92 to 1.09 in GERA (Fig. 5g), and from 1.13 to 1.71 in UK Biobank (Fig. 6g). In contrast, the  
733 genomic control factor from LDA MR-Egger ranges from 34.00 to 36.00 in WTCCC, from 69.82  
734 to 72.19 in GERA and from 17.75 to 29.85 in UK Biobank (Supplementary Table 1). With the  
735 same Bonferroni adjusted genome-wide p-value threshold, PMR-Egger detected 33 gene-trait  
736 pairs in WTCCC in which the cis-SNPs exhibit significant horizontal pleiotropy, 37 gene-trait  
737 pairs in GERA, and 626 gene-trait pairs in the UK Biobank.

738 Horizontal pleiotropic effect tests can help us explain some of the discrepancy in terms of the  
739 causal associations detected by PMR-Egger and the other methods. For example, for the trait of  
740 red blood cell count in UK Biobank, the *MAPT* gene on chromosome 17 shows a significant  
741 pleiotropy effect ( $p = 2.35 \times 10^{-9}$ ) but displays no significant causal effect ( $p=0.98$ ) by PMR-  
742 Egger. In contrast, *MAPT* is detected to be significantly associated with red blood cell count by  
743 PrediXcan ( $p = 8.11 \times 10^{-10}$ ), and, to a much lesser extent, by TWAS ( $p = 1.72 \times 10^{-3}$ ).

744 However, no previous evidence suggests that *MAPT* is associated with red blood cell count.  
745 Indeed, we found that the genomic location of *MAPT* (43,871,748-44,205,700) is close to and  
746 partially overlapped with *KANSL1* (44,007,282-44,402,733), which has been previously  
747 identified to be associated with red blood cell traits<sup>81,82</sup>. The association between *KANSL1* and  
748 red blood cell count is also detected by PMR-Egger ( $p = 1.02 \times 10^{-7}$ ), by CoMM ( $p = 2.72 \times$   
749  $10^{-8}$ ), and, to a much lesser extent, by TWAS ( $p = 1.66 \times 10^{-3}$ ) in the present study. By  
750 controlling for the expression level of the *KANSL1* gene in the PrediXcan framework, the  
751 association between the predicted *MAPT* expression level and red blood cell count is no longer  
752 significant ( $p = 0.10$ ). Therefore, the causal association between *MAPT* and red blood cell count  
753 detected by PrediXcan likely reflects either the true horizontal pleiotropic effect of *MAPT* cis-  
754 SNPs on red blood cell count through *KANSL1* or their tagging effects of the neighboring eQTLs  
755 of *KANSL1*. As another example, for height in the UK Biobank, the pseudogene *RP11-9E13.2*  
756 (70,137,755-70,340,521) on chromosome 10 has a significant pleiotropy effect ( $p = 1.08 \times$   
757  $10^{-13}$ ) but displays no significant causal effect ( $p=0.93$ ) by PMR-Egger. In contrast, *RP11-*  
758 *9E13.2* is detected to be significantly associated with height by PrediXcan ( $p = 4.34 \times 10^{-10}$ ),  
759 and, to a lesser extent, by TWAS ( $p = 9.05 \times 10^{-6}$ ). The pseudogene *RP11-9E13.2* is in the  
760 neighborhood of *MYPN* (69,765,912-70,071,774), which has been previously identified to be  
761 associated with height<sup>83</sup>. The association between *MYPN* and height is also detected by PMR-  
762 Egger ( $p = 1.82 \times 10^{-7}$ ), CoMM ( $p = 2.13 \times 10^{-14}$ ), and to a lesser extent, PrediXcan ( $p =$   
763  $3.94 \times 10^{-4}$ ) and TWAS ( $p = 1.55 \times 10^{-3}$ ), in the present study. By controlling for the  
764 predicted expression level of *MYPN* gene in the PrediXcan framework, the association between  
765 the predicted *RP11-9E13.2* expression level and height is no longer significant at the genome-  
766 wide threshold ( $p = 3.37 \times 10^{-4}$ ). Therefore, the causal association between the pseudogene

767 *RP11-9E13.2* and height as detected by PrediXcan and TWAS likely reflects either the  
768 horizontal pleiotropic effect of *RP11-9E13.2* cis-SNPs on height through *MYPN* or their tagging  
769 effects of the neighboring eQTLs of *MYPN*. The results suggest the practical importance of  
770 testing and controlling for pleiotropic effects in TWAS applications. Certainly, we acknowledge  
771 that, both these examples are focused on the special case where the false gene association with  
772 the trait disappears when conditional on a neighboring gene. We did not provide examples where  
773 the apparently false gene association with the trait may be explained by horizontal pleiotropic  
774 effects acted upon/through a gene far away, as it is often challenging to convincingly identify  
775 trans eQTL effects. In the special case we focused on, while it is possible that SNPs display true  
776 horizontal pleiotropic effects through the neighboring gene, it is equally likely that SNPs used in  
777 the model are simply tagging nearby eQTLs of the neighboring causal gene<sup>55,84</sup> and thus display  
778 apparent “horizontal pleiotropic effects” through the neighboring gene, as also mentioned above.  
779 Subsequently, the horizontal pleiotropic effect term in PMR-Egger may represent the apparent  
780 “horizontal pleiotropic effects” through SNP tagging to the nearby eQTLs of the causal gene,  
781 rather than the truly horizontal pleiotropic effect acted through other molecular pathways.  
782 Regardless of the interpretation of the horizontal pleiotropic effect term, we found it reassuring  
783 that by modeling the horizontal pleiotropic effect term in PMR-Egger can reduce false  
784 discoveries in the case of SNP tagging.

785 We note that an important feature of PMR-Egger is its ability to test both causal effect and  
786 horizontal pleiotropy effect simultaneously. We contrast the p-values obtained from these two  
787 different tests across genes for those traits in which at least one gene is detected as significant  
788 from either of the two tests ([Supplementary Figs. 38-40](#)). We found that different traits exhibit  
789 different gene association patterns. For example, some traits may only contain genes with a

790 significant causal effect but without a significant horizontal pleiotropic effect (e.g. CD and CAD  
791 in WTCCC; Allergic Rhinitis, Irritable Bowel Syndrome and Psychiatric disorders in GERA).  
792 Some traits may only contain genes with a significant horizontal pleiotropic effect but without a  
793 significant causal effect (e.g. Dermatophytosis in GERA). Some traits may contain genes with a  
794 significant causal effect as well as genes with a significant horizontal pleiotropic effect, but with  
795 the two sets of genes being non-overlapped (e.g. Asthma, Dyslipidemia, HT, Abdominal Hernia  
796 and Macular Degeneration in GERA; Fored Vitral Capacity in UK Biobank). While the majority  
797 of traits contain genes with both a significant causal effect and a significant horizontal  
798 pleiotropic effect. The top gene which is most significant for both causal effect test and  
799 pleiotropy test is highlighted in the plots. Being capable of testing both causal effect and  
800 horizontal pleiotropy effect facilitates our understanding of the gene association pattern with  
801 various different complex traits.

802

803

## 804 **Discussion**

805 We have presented a data generative model and a likelihood framework for MR analysis that  
806 unifies many existing transcriptome wide association analysis methods and many existing MR  
807 methods. Under the framework, we have presented PMR-Egger, a new method that conducts MR  
808 analysis using multiple correlated instruments while properly controlling for horizontal  
809 pleiotropic effects. By properly controlling for horizontal pleiotropic effects and making  
810 inference under a likelihood framework, PMR-Egger yields calibrated p-values across a wide  
811 range of scenarios and improves power of MR analysis over existing approaches. We have  
812 illustrated the benefits of PMR-Egger through extensive simulations and multiple real data  
813 applications of TWAS.

814 One important modeling assumption we made in PMR-Egger is that the horizontal pleiotropic  
815 effects of all SNPs equal to each other. The equal effect size assumption directly follows the  
816 commonly used Egger regression modeling assumption for MR analysis and is analogous to the  
817 burden effect size assumption commonly used for rare variant tests. Consistent with existing  
818 literature on applications of the Egger regression and burden test, we also found that equal effect  
819 size assumption employed in PMR-Egger works reasonably robust for causal effect estimation  
820 and testing with respect to a range of model mis-specifications and appears to be effective in  
821 several real data applications examined here. However, we do acknowledge that our equal effect  
822 size assumption in PMR-Egger can be overly restrictive in many settings. For example, as  
823 described in the Results, in the absence of direction pleiotropy, the pleiotropic effect estimate  
824 becomes down-ward biased and the pleiotropic effect test loses power. We have attempted to  
825 alleviate this restrictive modeling assumption by imposing an alternative modeling assumption  
826 on the horizontal effect sizes based on variance component assumption. In particular, we have

827 attempted to assume that the horizontal pleiotropic effect of each SNP follows a normal  
828 distribution with mean zero and a certain variance component parameter, i.e. analogous to the  
829 SKAT test assumption<sup>85</sup>. Such variance component assumption is a more flexible modeling  
830 assumption than the equal effect size assumption, potentially alleviating much of the concern  
831 with respect to the sensitivity and robustness of equal effect size assumption. Unfortunately,  
832 under the variance component assumption, inference for the resulting PMR model becomes  
833 overly complicated. In particular, due to the estimation uncertainty in the hyper-parameter  
834 estimates, the p-values from the PMR variance component model becomes severely deflated  
835 even under simple null simulations (Supplementary Fig. S42). Such deflation of p-values has  
836 been previously observed in variance component tests for microbiome applications<sup>86</sup>. Only few  
837 methods exist to address such p-value in-calibration issue resulting from hyper-parameter  
838 estimation uncertainty<sup>87</sup>, and it is not straightforward to adapt any of these methods to our PMR  
839 variance component model. Besides the equal effect size modeling restriction, we also note that  
840 neither PMR-Egger nor the PMR variance component model is capable of accounting for  
841 correlation between horizontal pleiotropic effects  $\gamma$  and the SNP effects on gene expression  $\beta$ .  
842 Therefore, while we view PMR-Egger as an important first step towards effective control of  
843 horizontal pleiotropic effects in TWAS applications, we emphasize that imposing more realistic  
844 modeling assumptions on the horizontal pleiotropic effects in the PMR framework will likely  
845 yield more fruitful results in the future.

846 We have primarily focused on modeling continuous traits with PMR-Egger. For case control  
847 studies, we have followed previous approaches and directly treated binary phenotypes as  
848 continuous outcomes<sup>19,53,88,89</sup>, which appears to work well in both WTCCC and GERA data  
849 applications we examined. Treating binary phenotypes as continuous outcomes can be justified

850 by recognizing the linear model as a first order Taylor approximation to a generalized linear  
851 model<sup>53</sup>. However, it would be desirable to extend PMR-Egger to accommodate case control  
852 data or other discrete data types in a principled way, by, for example, extending PMR-Egger into  
853 the generalized linear model framework. In particular, we could use a probit or a logistic link to  
854 extend PMR-Egger to directly model case control data. Extending PMR-Egger to model discrete  
855 data types using the generalized linear model framework would likely lead to wider applications  
856 of PMR-Egger and is thus an important avenue for future research.

857 We have primarily focused on modeling individual-level data with PMR-Egger. However, like  
858 many other linear model-based methods in statistical genetics, PMR-Egger can also be easily  
859 extended to make use of summary statistics. The summary statistics version of PMR-Egger is  
860 described in detail in the [Supplementary Text](#). Briefly, the summary statistics version of PMR-  
861 Egger requires marginal SNP effect size estimates and their standard errors, both on the gene  
862 expression and on the trait of interest. In addition, it requires a SNP by SNP correlation matrix  
863 that can be constructed based on a reference panel. We validated the implementation of the  
864 summary statistics-based approach of PMR-Egger in simulations (details in [Materials and](#)  
865 [Methods](#)). In the comparison, we constructed the SNP by SNP correlation matrix from three  
866 different reference panels, by using either all individuals from the GWAS data, 10% randomly  
867 selected individuals from the GWAS data, or individuals of European ancestry from the 1,000  
868 Genomes project. We applied the summary statistics-based approach of PMR-Egger to each  
869 reference panel and compared results with the individual level data-based approach of PMR-  
870 Egger that was applied to the complete data. The p values from both approaches for testing  
871 causal effects as well as for testing pleiotropy effects are largely consistent with each other,  
872 demonstrating the effectiveness of summary statistics-based approach of PMR-Egger



873 (Supplementary Fig. 43). The summary statistics-based approach of PMR-Egger is implemented  
874 in the same software package. Being able to make use of summary statistics extends the  
875 applicability of PMR-Egger to data sets where individual-level genotype or phenotype are not  
876 available.

877 Finally, in addition to what we have already mentioned in the [Materials and Methods](#), we  
878 emphasize here again, that, while we have followed the previous MR literature and use “causal  
879 effect” through the text, the effect is causal only when certain MR modeling assumptions hold.  
880 These MR assumptions are often not straightforward to prove. For example, without measuring  
881 all potential confounders, it is not straightforward to argue that the SNP instruments are not  
882 associated with any other confounders that may be associated with both exposure and outcome.  
883 Therefore, we caution against the over-interpretation of causal inference in observation studies  
884 such as TWAS applications. However, we do believe MR is an important step that allows us to  
885 move beyond standard linear regressions and is an important analysis that can provide potentially  
886 more trustworthy evidence with regard to causality compared to simpler approaches.

887

888

889

890

891

892

893

894

895

896 **Code availability.** Our method is implemented in the R package PMR, freely available at  
897 <http://www.xzlab.org/software.html> and <https://cran.r-project.org/web/packages/PPMR/index.html>.

898 The code to reproduce all the analyses are available on GitHub  
899 (<https://github.com/yuanzhongshang/PMRreproduce>).

900 **Data availability.** No data were generated in the present study. The GEUVADIS gene  
901 expression data is publicly available at <http://www.geuvadis.org>. The WTCCC genotype and  
902 phenotype data is publicly available at <https://www.wtccc.org.uk>. The GERA genotype and  
903 phenotype data is available in dbGaP (<https://www.ncbi.nlm.nih.gov/gap>) with accession number  
904 phs000788. The UK Biobank data is from UK Biobank resource under Application Number  
905 30686.

906

## 907 **References**

- 908 1 Gamazon, E. R. *et al.* A gene-based association method for mapping traits using reference  
909 transcriptome data. *Nature genetics* **47**, 1091-1098 (2015).
- 910 2 Gusev, A. *et al.* Integrative approaches for large-scale transcriptome-wide association studies.  
911 *Nature genetics* **48**, 245-252 (2016).
- 912 3 Zhu, Z. *et al.* Integration of summary data from GWAS and eQTL studies predicts complex trait  
913 gene targets. *Nature genetics* **48**, 481-487 (2016).
- 914 4 Zhu, Z. *et al.* Causal associations between risk factors and common diseases inferred from GWAS  
915 summary data. *Nature communications* **9**, 224 (2018).
- 916 5 Burgess, S., Small, D. S. & Thompson, S. G. A review of instrumental variable estimators for  
917 Mendelian randomization. *Statistical methods in medical research* **26**, 2333-2355 (2017).
- 918 6 Ference, B. A. *et al.* Variation in PCSK9 and HMGCR and risk of cardiovascular disease and  
919 diabetes. *New England Journal of Medicine* **375**, 2144-2153 (2016).
- 920 7 Helgadottir, A. *et al.* Variants with large effects on blood lipids and the role of cholesterol and  
921 triglycerides in coronary disease. *Nature genetics* **48**, 634-639 (2016).
- 922 8 Pingault, J.-B. *et al.* Using genetic data to strengthen causal inference in observational research.  
923 *Nature Reviews Genetics* **19**, 566-580 (2018).
- 924 9 Zheng, J. *et al.* Recent developments in Mendelian randomization studies. *Current epidemiology*  
925 *reports* **4**, 330-345 (2017).
- 926 10 Haycock, P. C. *et al.* Best (but oft-forgotten) practices: the design, analysis, and interpretation of  
927 Mendelian randomization studies. *The American journal of clinical nutrition* **103**, 965-978 (2016).
- 928 11 Lawlor, D. A. Commentary: Two-sample Mendelian randomization: opportunities and challenges.  
929 *International journal of epidemiology* **45**, 908-915 (2016).
- 930 12 Bowden, J. *et al.* A framework for the investigation of pleiotropy in two-sample summary data  
931 Mendelian randomization. *Statistics in medicine* **36**, 1783-1802 (2017).
- 932 13 Bowden, J., Smith, G. D. & Burgess, S. Mendelian randomization with invalid instruments: effect  
933 estimation and bias detection through Egger regression. *International journal of epidemiology*  
934 **44**, 512-525 (2015).
- 935 14 Bowden, J., Davey Smith, G., Haycock, P. C. & Burgess, S. Consistent estimation in Mendelian  
936 randomization with some invalid instruments using a weighted median estimator. *Genetic*  
937 *epidemiology* **40**, 304-314 (2016).
- 938 15 Burgess, S., Butterworth, A. & Thompson, S. G. Mendelian Randomization Analysis With Multiple  
939 Genetic Variants Using Summarized Data. *Genetic epidemiology* **37**, 658-665 (2013).
- 940 16 Burgess, S., Dudbridge, F. & Thompson, S. G. Combining information on multiple instrumental  
941 variables in Mendelian randomization: comparison of allele score and summarized data  
942 methods. *Statistics in medicine* **35**, 1880-1906 (2016).
- 943 17 Burgess, S. & Thompson, S. G. Bias in causal estimates from Mendelian randomization studies  
944 with weak instruments. *Statistics in medicine* **30**, 1312-1323 (2011).
- 945 18 Yang, C. *et al.* CoMM: a collaborative mixed model to dissecting genetic contributions to  
946 complex traits by leveraging regulatory information. *Bioinformatics*,  
947 doi:10.1093/bioinformatics/bty865 (2018).
- 948 19 Zeng, P. & Zhou, X. Non-parametric genetic prediction of complex traits with latent Dirichlet  
949 process regression models. *Nature communications* **8**, 456 (2017).
- 950 20 Nagpal, S. *et al.* TIGAR: An Improved Bayesian Tool for Transcriptomic Data Imputation Enhances  
951 Gene Mapping of Complex Traits. *The American Journal of Human Genetics* (2019).

- 952 21 Verbanck, M., Chen, C.-Y., Neale, B. & Do, R. Detection of widespread horizontal pleiotropy in  
953 causal relationships inferred from Mendelian randomization between complex traits and  
954 diseases. *Nature genetics* **50**, 693-698 (2018).
- 955 22 Hemani, G., Bowden, J. & Davey Smith, G. Evaluating the potential role of pleiotropy in  
956 Mendelian randomization studies. *Human molecular genetics* **27**, R195-R208 (2018).
- 957 23 Jordan, D. M., Verbanck, M. & Do, R. The landscape of pervasive horizontal pleiotropy in human  
958 genetic variation is driven by extreme polygenicity of human traits and diseases. *bioRxiv*, 311332  
959 (2018).
- 960 24 Park, Y. *et al.* A Bayesian approach to mediation analysis predicts 206 causal target genes in  
961 Alzheimer's disease. *bioRxiv*, 219428 (2017).
- 962 25 Kang, H., Zhang, A., Cai, T. T. & Small, D. S. Instrumental variables estimation with some invalid  
963 instruments and its application to Mendelian randomization. *Journal of the American statistical*  
964 *Association* **111**, 132-144 (2016).
- 965 26 Guo, Z., Kang, H., Tony Cai, T. & Small, D. S. Confidence intervals for causal effects with invalid  
966 instruments by using two-stage hard thresholding with voting. *Journal of the Royal Statistical*  
967 *Society: Series B (Statistical Methodology)* **80**, 793-815 (2018).
- 968 27 Burgess, S. & Thompson, S. G. Interpreting findings from Mendelian randomization using the  
969 MR-Egger method. *European journal of epidemiology* **32**, 391-392 (2017).
- 970 28 Dai, J. Y. *et al.* Diagnostics of Pleiotropy in Mendelian Randomization Studies: Global and  
971 Individual Tests for Direct Effects. *American journal of epidemiology* **187**, 2672-2680 (2018).
- 972 29 Zhao, Q., Wang, J., Bowden, J. & Small, D. S. Statistical inference in two-sample summary-data  
973 Mendelian randomization using robust adjusted profile score. *arXiv:1801.09652* (2018).
- 974 30 Qi, G. & Chatterjee, N. Mendelian Randomization Analysis Using Mixture Models (MRMix) for  
975 Genetic Effect-Size-Distribution Leads to Robust Estimation of Causal Effects. *bioRxiv*, 367821  
976 (2018).
- 977 31 Berzuini, C., Guo, H., Burgess, S. & Bernardinelli, L. A Bayesian approach to Mendelian  
978 randomization with multiple pleiotropic variants. *Biostatistics*, 1-16 (2018).
- 979 32 Li, S. Mendelian randomization when many instruments are invalid: hierarchical empirical Bayes  
980 estimation. *arXiv:1706.01389* (2017).
- 981 33 Barfield, R. *et al.* Transcriptome-wide association studies accounting for colocalization using  
982 Egger regression. *Genetic epidemiology* **42**, 418-433 (2018).
- 983 34 Dawid, A. P. Causal inference without counterfactuals. *Journal of the American statistical*  
984 *Association* **95**, 407-424 (2000).
- 985 35 Dawid, A. P. Statistical causality from a decision-theoretic perspective. *Annual Review of*  
986 *Statistics and Its Application* **2**, 273-303 (2015).
- 987 36 Berzuini, C., Dawid, P. & Bernardinelli, L. *Causality: Statistical perspectives and applications*.  
988 (John Wiley & Sons, 2012).
- 989 37 Lappalainen, T. *et al.* Transcriptome and genome sequencing uncovers functional variation in  
990 humans. *Nature* **501**, 506-511 (2013).
- 991 38 Banda, Y. *et al.* Characterizing race/ethnicity and genetic ancestry for 100,000 subjects in the  
992 Genetic Epidemiology Research on Adult Health and Aging (GERA) cohort. *Genetics* **200**, 1285-  
993 1295 (2015).
- 994 39 Kvale, M. N. *et al.* Genotyping informatics and quality control for 100,000 subjects in the Genetic  
995 Epidemiology Research on Adult Health and Aging (GERA) cohort. *Genetics* **200**, 1051-1060  
996 (2015).
- 997 40 Price, A. L. *et al.* Effects of cis and trans genetic ancestry on gene expression in African  
998 Americans. *Plos Genetics* **4**, e1000294 (2008).

- 999 41 Price, A. L. *et al.* Single-tissue and cross-tissue heritability of gene expression via identity-by-  
1000 descent in related or unrelated individuals. *Plos Genetics* **7**, e1001317 (2011).
- 1001 42 Consortium, W. T. C. C. Genome-wide association study of 14,000 cases of seven common  
1002 diseases and 3,000 shared controls. *Nature* **447**, 661-678 (2007).
- 1003 43 Bycroft, C. *et al.* The UK Biobank resource with deep phenotyping and genomic data. *Nature* **562**,  
1004 203-209 (2018).
- 1005 44 Wen, X., Luca, F. & Pique-Regi, R. Cross-population joint analysis of eQTLs: fine mapping and  
1006 functional annotation. *Plos Genetics* **11**, e1005176 (2015).
- 1007 45 Harrow, J. *et al.* GENCODE: the reference human genome annotation for The ENCODE Project.  
1008 *Genome research* **22**, 1760-1774 (2012).
- 1009 46 Stegle, O., Parts, L., Piipari, M., Winn, J. & Durbin, R. Using probabilistic estimation of expression  
1010 residuals (PEER) to obtain increased power and interpretability of gene expression analyses.  
1011 *Nature protocols* **7**, 500-507 (2012).
- 1012 47 Guan, Y. & Stephens, M. Practical issues in imputation-based association mapping. *Plos Genetics*  
1013 **4**, e1000279 (2008).
- 1014 48 Howie, B. N., Donnelly, P. & Marchini, J. A flexible and accurate genotype imputation method for  
1015 the next generation of genome-wide association studies. *Plos Genetics* **5**, e1000529 (2009).
- 1016 49 Delaneau, O., Zagury, J.-F. & Marchini, J. Improved whole-chromosome phasing for disease and  
1017 population genetic studies. *Nature methods* **10**, 5-6 (2012).
- 1018 50 McCarthy, S. *et al.* A reference panel of 64,976 haplotypes for genotype imputation. *Nature*  
1019 *genetics* **48**, 1279-1283 (2016).
- 1020 51 Das, S. *et al.* Next-generation genotype imputation service and methods. *Nature genetics* **48**,  
1021 1284-1287 (2016).
- 1022 52 Loh, P.-R., Kichaev, G., Gazal, S., Schoech, A. P. & Price, A. L. Mixed-model association for  
1023 biobank-scale datasets. *Nature genetics* **50**, 906-908 (2018).
- 1024 53 Zhou, X., Carbonetto, P. & Stephens, M. Polygenic Modeling with Bayesian Sparse Linear Mixed  
1025 Models. *Plos Genetics* **9**, : e1003264. (2013).
- 1026 54 Zhou, X. & Stephens, M. Genome-wide efficient mixed-model analysis for association studies.  
1027 *Nature genetics* **44**, 821-824 (2012).
- 1028 55 Mancuso, N. *et al.* Probabilistic fine-mapping of transcriptome-wide association studies. *Nature*  
1029 *genetics* **51**, 675 (2019).
- 1030 56 Berisa, T. & Pickrell, J. K. Approximately independent linkage disequilibrium blocks in human  
1031 populations. *Bioinformatics* **32**, 283 (2016).
- 1032 57 Barbeira, A. N. *et al.* Exploring the phenotypic consequences of tissue specific gene expression  
1033 variation inferred from GWAS summary statistics. *Nature communications* **9**, 1825 (2018).
- 1034 58 Yengo, L. *et al.* Meta-analysis of genome-wide association studies for height and body mass  
1035 index in approximately 700000 individuals of European ancestry. *Hum Mol Genet* **27**, 3641-3649,  
1036 doi:10.1093/hmg/ddy271 (2018).
- 1037 59 Kamatani, Y. *et al.* Genome-wide association study of hematological and biochemical traits in a  
1038 Japanese population. *Nature genetics* **42**, 210 (2010).
- 1039 60 Soranzo, N. *et al.* A genome-wide meta-analysis identifies 22 loci associated with eight  
1040 hematological parameters in the HaemGen consortium. *Nature genetics* **41**, 1182 (2009).
- 1041 61 Auer, P. L. *et al.* Rare and low-frequency coding variants in CXCR2 and other genes are  
1042 associated with hematological traits. *Nature genetics* **46**, 629 (2014).
- 1043 62 Bersenev, A., Wu, C., Balcerak, J. & Tong, W. Lnk controls mouse hematopoietic stem cell self-  
1044 renewal and quiescence through direct interactions with JAK2. *The Journal of clinical*  
1045 *investigation* **118**, 2832-2844 (2008).

- 1046 63 Tong, W. & Lodish, H. F. Lnk inhibits Tpo–mpl signaling and Tpo-mediated megakaryocytopoiesis.  
1047 *Journal of Experimental Medicine* **200**, 569-580 (2004).
- 1048 64 Takizawa, H. *et al.* Lnk regulates integrin  $\alpha\text{IIb}\beta\text{3}$  outside-in signaling in mouse platelets, leading  
1049 to stabilization of thrombus development in vivo. *The Journal of clinical investigation* **120**, 179-  
1050 190 (2010).
- 1051 65 Viny, A. D. & Levine, R. L. Genetics of myeloproliferative neoplasms. *Cancer journal (Sudbury,*  
1052 *Mass.)* **20**, 61 (2014).
- 1053 66 Bersenev, A. *et al.* Lnk constrains myeloproliferative diseases in mice. *The Journal of clinical*  
1054 *investigation* **120**, 2058-2069 (2010).
- 1055 67 Yamamoto, S. & Ma, X. Role of Nod2 in the development of Crohn's disease. *Microbes and*  
1056 *infection* **11**, 912-918 (2009).
- 1057 68 McGovern, D., Van Heel, D., Ahmad, T. & Jewell, D. NOD2 (CARD15), the first susceptibility gene  
1058 for Crohn's disease. *Gut* **49**, 752-754 (2001).
- 1059 69 Hugot, J.-P. *et al.* Mapping of a susceptibility locus for Crohn's disease on chromosome 16.  
1060 *Nature* **379**, 821 (1996).
- 1061 70 Hugot, J.-P. *et al.* Association of NOD2 leucine-rich repeat variants with susceptibility to Crohn's  
1062 disease. *Nature* **411**, 599 (2001).
- 1063 71 Ogura, Y. *et al.* A frameshift mutation in NOD2 associated with susceptibility to Crohn's disease.  
1064 *Nature* **411**, 603 (2001).
- 1065 72 Franke, A. *et al.* Genome-wide meta-analysis increases to 71 the number of confirmed Crohn's  
1066 disease susceptibility loci. *Nature genetics* **42**, 1118 (2010).
- 1067 73 Franke, A. *et al.* Replication of signals from recent studies of Crohn's disease identifies  
1068 previously unknown disease loci for ulcerative colitis. *Nature genetics* **40**, 713 (2008).
- 1069 74 Kennedy, N. A. *et al.* The impact of NOD2 variants on fecal microbiota in Crohn's disease and  
1070 controls without gastrointestinal disease. *Inflammatory bowel diseases* **24**, 583-592 (2018).
- 1071 75 Sidiq, T., Yoshihama, S., Downs, I. & Kobayashi, K. S. Nod2: a critical regulator of ileal microbiota  
1072 and Crohn's disease. *Front Immunol* **7**, 367 (2016).
- 1073 76 Keel, S. B. *et al.* Evidence that the expression of transferrin receptor 1 on erythroid marrow cells  
1074 mediates hepcidin suppression in the liver. *Experimental hematology* **43**, 469-478. e466 (2015).
- 1075 77 Andrews, N. C. Genes determining blood cell traits. *Nature genetics* **41**, 1161 (2009).
- 1076 78 Ganesh, S. K. *et al.* Multiple loci influence erythrocyte phenotypes in the CHARGE Consortium.  
1077 *Nature genetics* **41**, 1191 (2009).
- 1078 79 Lo, K. S. *et al.* Genetic association analysis highlights new loci that modulate hematological trait  
1079 variation in Caucasians and African Americans. *Human genetics* **129**, 307-317 (2011).
- 1080 80 Levy, J. E., Jin, O., Fujiwara, Y., Kuo, F. & Andrews, N. Transferrin receptor is necessary for  
1081 development of erythrocytes and the nervous system. *Nature genetics* **21**, 396 (1999).
- 1082 81 Kanai, M. *et al.* Genetic analysis of quantitative traits in the Japanese population links cell types  
1083 to complex human diseases. *Nature genetics* **50**, 390-400 (2018).
- 1084 82 Astle, W. J. *et al.* The allelic landscape of human blood cell trait variation and links to common  
1085 complex disease. *Cell* **167**, 1415-1429 (2016).
- 1086 83 Wood, A. R. *et al.* Defining the role of common variation in the genomic and biological  
1087 architecture of adult human height. *Nature genetics* **46**, 1173-1186 (2014).
- 1088 84 Wainberg, M. *et al.* Opportunities and challenges for transcriptome-wide association studies.  
1089 *Nature genetics* **51**, 592 (2019).
- 1090 85 Wu, M. C. *et al.* Rare-variant association testing for sequencing data with the sequence kernel  
1091 association test. *The American Journal of Human Genetics* **89**, 82-93 (2011).
- 1092 86 Zhao, N. *et al.* Testing in microbiome-profiling studies with MiRKAT, the microbiome regression-  
1093 based kernel association test. *The American Journal of Human Genetics* **96**, 797-807 (2015).



- 1094 87 Chen, J., Chen, W., Zhao, N., Wu, M. C. & Schaid, D. J. Small sample kernel association tests for  
1095 human genetic and microbiome association studies. *Genetic epidemiology* **40**, 5-19 (2016).  
1096 88 Yang, J., Fritsche, L. G., Zhou, X., Abecasis, G. & Consortium, I. A.-R. M. D. G. A scalable Bayesian  
1097 method for integrating functional information in genome-wide association studies. *The*  
1098 *American Journal of Human Genetics* **101**, 404-416 (2017).  
1099 89 Crawford, L., Zeng, P., Mukherjee, S. & Zhou, X. Detecting epistasis with the marginal epistasis  
1100 test in genetic mapping studies of quantitative traits. *Plos Genetics* **13**, e1006869 (2017).

1101

1102

1103

1104

1105

1106

1107

1108

1109

1110

1111

1112

1113

1114

1115

1116

1117

1118

1119

1120

## 1121 **Acknowledgements**

1122 This study was supported by the National Institutes of Health (NIH) grants R01HG009124 and  
1123 R01HL142023, National Science Foundation (NSF) grant DMS1712933, and the National  
1124 Natural Science Foundation of China (81872712 and 81673272). We thank the Wellcome Trust  
1125 Centre for Human Genetics for making the heterogenous stock mouse data available online. This  
1126 study makes use of data generated by the Wellcome Trust Case Control Consortium (WTCCC).  
1127 A full list of the investigators who contributed to the generation of the data is available from  
1128 <http://www.wtccc.org.uk/>. Funding for the WTCCC project was provided by the Wellcome  
1129 Trust under award 076113 and 085475. The GERA Data (dbGaP accession number phs000788)  
1130 came from a grant, the Resource for Genetic Epidemiology Research in Adult Health and Aging  
1131 (RC2 AG033067; Schaefer and Risch, PIs) awarded to the Kaiser Permanente Research Program  
1132 on Genes, Environment, and Health (RPGEH) and the UCSF Institute for Human Genetics. The  
1133 RPGEH was supported by grants from the Robert Wood Johnson Foundation, the Wayne and  
1134 Gladys Valley Foundation, the Ellison Medical Foundation, Kaiser Permanente Northern  
1135 California, and the Kaiser Permanente National and Northern California Community Benefit  
1136 Programs. The RPGEH and the Resource for Genetic Epidemiology Research in Adult Health  
1137 and Aging are described in the following publication, Schaefer C, et al., The Kaiser Permanente  
1138 Research Program on Genes, Environment and Health: Development of a Research Resource in a  
1139 Multi-Ethnic Health Plan with Electronic Medical Records, in preparation, 2013. This study has  
1140 been conducted using UK Biobank resource under Application Number 30686. UK Biobank was  
1141 established by the Wellcome Trust medical charity, Medical Research Council, Department of  
1142 Health, Scottish Government and the Northwest Regional Development Agency. It has also had  
1143 funding from the Welsh Assembly Government, British Heart Foundation and Diabetes UK.

1144

## 1145 **Author contributions**

1146 XZ conceived the idea and provided funding support. XZ and ZY developed the methods. ZY  
1147 developed the software tool with assistance from JL and CY. ZY performed simulations and real  
1148 data analysis with assistance from HZ, PZ, SY, and SS. XZ and ZY wrote the manuscript with  
1149 input from all other authors. All authors reviewed and approved the final manuscript.

1150

1151 **Competing interests:** The authors declare no competing interests.

1152

1153



**Table 1** Summary of some existing MR methods

|                              | Design            | Instrumental variable | $\beta$ effect assumption | $\gamma$ effect assumption | Estimation procedure |
|------------------------------|-------------------|-----------------------|---------------------------|----------------------------|----------------------|
| PrediXcan <sup>1</sup>       | Two-sample        | Correlated            | Elastic net               | N/A                        | Two-stage            |
| TWAS <sup>2</sup>            | Two-sample        | Correlated            | BSLMM                     | N/A                        | Two-stage            |
| SMR <sup>3</sup>             | Two-sample        | Univariate            | Fixed effect              | N/A                        | Two-stage            |
| GSMR <sup>4</sup>            | Two-sample        | independent           | Fixed effect              | N/A                        | Two-stage            |
| MR-Egger <sup>13</sup>       | Two-sample        | Independent           | Fixed effect              | Equal effect size          | Two-stage            |
| CoMM <sup>18</sup>           | Two-sample        | Correlated            | Normal                    | N/A                        | MLE                  |
| CaMMEL <sup>24</sup>         | Two-sample        | Correlated            | Fixed effect              | Normal                     | Variational Bayes    |
| Kang et al. <sup>25</sup>    | One-sample        | Correlated            | Fixed effect              | Lasso                      | Two-stage            |
| MRMix <sup>30</sup>          | Two-sample        | Independent           | Normal Mixture            | Normal Mixture             | Estimating equation  |
| Berzuni et al. <sup>31</sup> | One-sample        | Correlated            | Fixed effect              | Horseshoe                  | MCMC                 |
| LDA MR-Egger <sup>32</sup>   | Two-sample        | Correlated            | Fixed effect              | Equal effect size          | Two-stage            |
| DPR <sup>19</sup>            | Two-sample        | Correlated            | Latent Dirichlet process  | N/A                        | Two-stage            |
| TIGAR <sup>20</sup>          | Two-sample        | Correlated            | Latent Dirichlet process  | N/A                        | Two-stage            |
| <b>PMR-Egger</b>             | <b>Two-sample</b> | <b>Correlated</b>     | <b>Normal</b>             | <b>Equal effect size</b>   | <b>MLE</b>           |

Methods are categorized based on the experimental design (two-sample vs one-sample vs both), the characterizes of selected instrumental variables (univariate vs multiple independent vs multiple correlated),  $\beta$  effect size assumption,  $\gamma$  effect size assumption, estimation/inference procedure (ratio-based vs two-stage estimation vs maximum likelihood vs Bayesian), and input data type (individual-level vs summary; which is now removed per reviewer's request). The categorization of inference procedure generally follows ref [5]. In the inference procedure, the two-stage estimation procedure comprises two regression stages: the first-stage regression of the exposure on the instrumental variables, and the second-stage regression of the outcome on the fitted values of the exposure from the first stage. Some inference procedures, such as the inverse variance weighted (IVW) procedure (e.g. MR-Egger<sup>13</sup>) or the ratio method (e.g. for SMR<sup>3</sup>) are categorized as two-stage procedure here, as both are asymptotically equivalent to a two-stage estimation procedure in the case of independent instruments. We only list MR methods that directly take input instruments into the model; many MR methods that performs various selection procedures on the instruments (e.g. Guo et al<sup>26</sup>) are not included in the table. Some recently developed methods that only test for horizontal pleiotropy, such as GLIDE<sup>28</sup> and MR-PRESSO<sup>21</sup> are not included in the table.

**Table 2.** Mean computational time (in second) of various MR methods

| Trait                                      | #SNP in the exemplary gene | CoMM          | PMR-Egger     | TWAS       | LDA MR-Egger | SMR            | PrediXcan   | MR-PRESSO       |
|--------------------------------------------|----------------------------|---------------|---------------|------------|--------------|----------------|-------------|-----------------|
| T1D from WTCCC (n=4901)                    | 300                        | 0.51(0.19)    | 0.80(0.57)    | 1.97(0.86) | 0.08(0.02)   | 0.0003(0.0005) | 26.74(2.81) | 408.27(74.76)   |
|                                            | 500                        | 1.21(0.41)    | 1.42(0.77)    | 3.48(1.16) | 0.14(0.03)   | 0.0004(0.0005) | 11.77(0.64) | 829.04(135.79)  |
|                                            | 983                        | 5.85(1.50)    | 9.79(1.56)    | 4.69(1.73) | 0.60(0.09)   | 0.0004(0.0005) | 9.96(0.78)  | 2023.77(260.43) |
|                                            | 2106                       | 111.00(12.87) | 97.33(7.63)   | 5.87(2.26) | 4.18(0.59)   | 0.0005(0.0005) | 22.90(2.63) | 4913.22(554.47) |
| Asthma from GERA (n=61,953)                | 300                        | 1.47(0.29)    | 2.06(0.22)    | 2.61(1.48) | 0.05(0.02)   | 0.0002(0.0004) | 33.39(3.09) | 464.64(62.18)   |
|                                            | 500                        | 1.21(0.33)    | 4.21(0.81)    | 2.54(0.87) | 0.09(0.03)   | 0.0002(0.0004) | 11.71(0.70) | 919.66(102.83)  |
|                                            | 1000                       | 24.37(5.13)   | 21.68(1.66)   | 3.07(2.55) | 0.46(0.13)   | 0.0002(0.0004) | 14.29(1.30) | 2275.42(263.95) |
|                                            | 2008                       | 59.01(4.98)   | 52.52(4.47)   | 4.51(1.48) | 2.33(0.71)   | 0.0004(0.0005) | 20.18(3.28) | 5213.73(601.46) |
| Platelet Count from UK Biobank (n=337,198) | 300                        | 2.56(0.53)    | 5.57(4.54)    | 5.04(4.19) | 0.09(0.02)   | 0.0008(0.0004) | 10.93(1.96) | 471.55(50.44)   |
|                                            | 500                        | 6.82(2.75)    | 7.61(2.30)    | 5.44(4.30) | 0.15(0.02)   | 0.0007(0.0005) | 12.17(1.04) | 876.06(92.90)   |
|                                            | 1052                       | 24.92(6.28)   | 23.59(3.21)   | 5.91(4.79) | 0.81(0.09)   | 0.0008(0.0004) | 16.05(2.38) | 2133.03(77.56)  |
|                                            | 2605                       | 186.14(28.45) | 178.68(16.75) | 5.37(0.73) | 8.11(1.20)   | 0.0008(0.0004) | 9.89(1.74)  | 6949.72(245.75) |

Computation is carried out on a single thread of a Xeon Gold 6138 CPU. The computation time is averaged across 20 replicates, with values inside parentheses denoting the standard deviation. #SNP denotes the number of cis-SNPs for four exemplary genes in each study. The computational time for MR-PRESSO is based on 10,000 permutations.

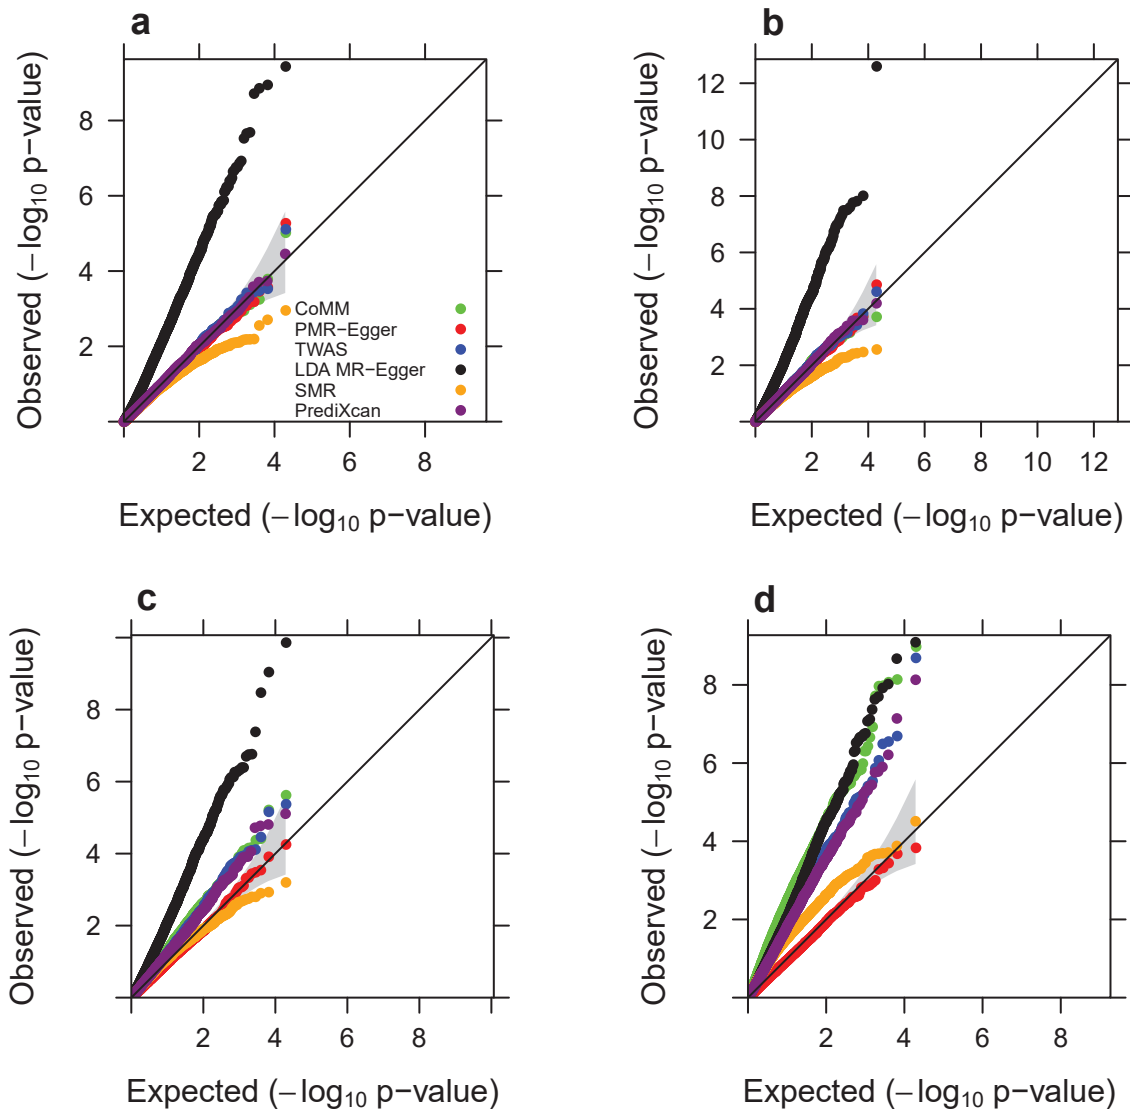

**Fig. 1** Quantile-quantile plot of  $-\log_{10}$  p-values from different methods for testing the causal effect either in the absence or in the presence of horizontal pleiotropic effect under null simulations. Compared methods include CoMM (green), PMR-Egger (red), TWAS (blue), LDA MR-Egger (black), SMR (orange), and PrediXcan (purple). Null simulations are performed under different horizontal pleiotropic effect sizes: (a)  $\gamma=0$ ; (b)  $\gamma=0.0001$ ; (c)  $\gamma=0.0005$ ; (d)  $\gamma=0.001$ . Only p-values from PMR-Egger adhere to the expected diagonal line across a range of horizontal pleiotropic effect sizes.

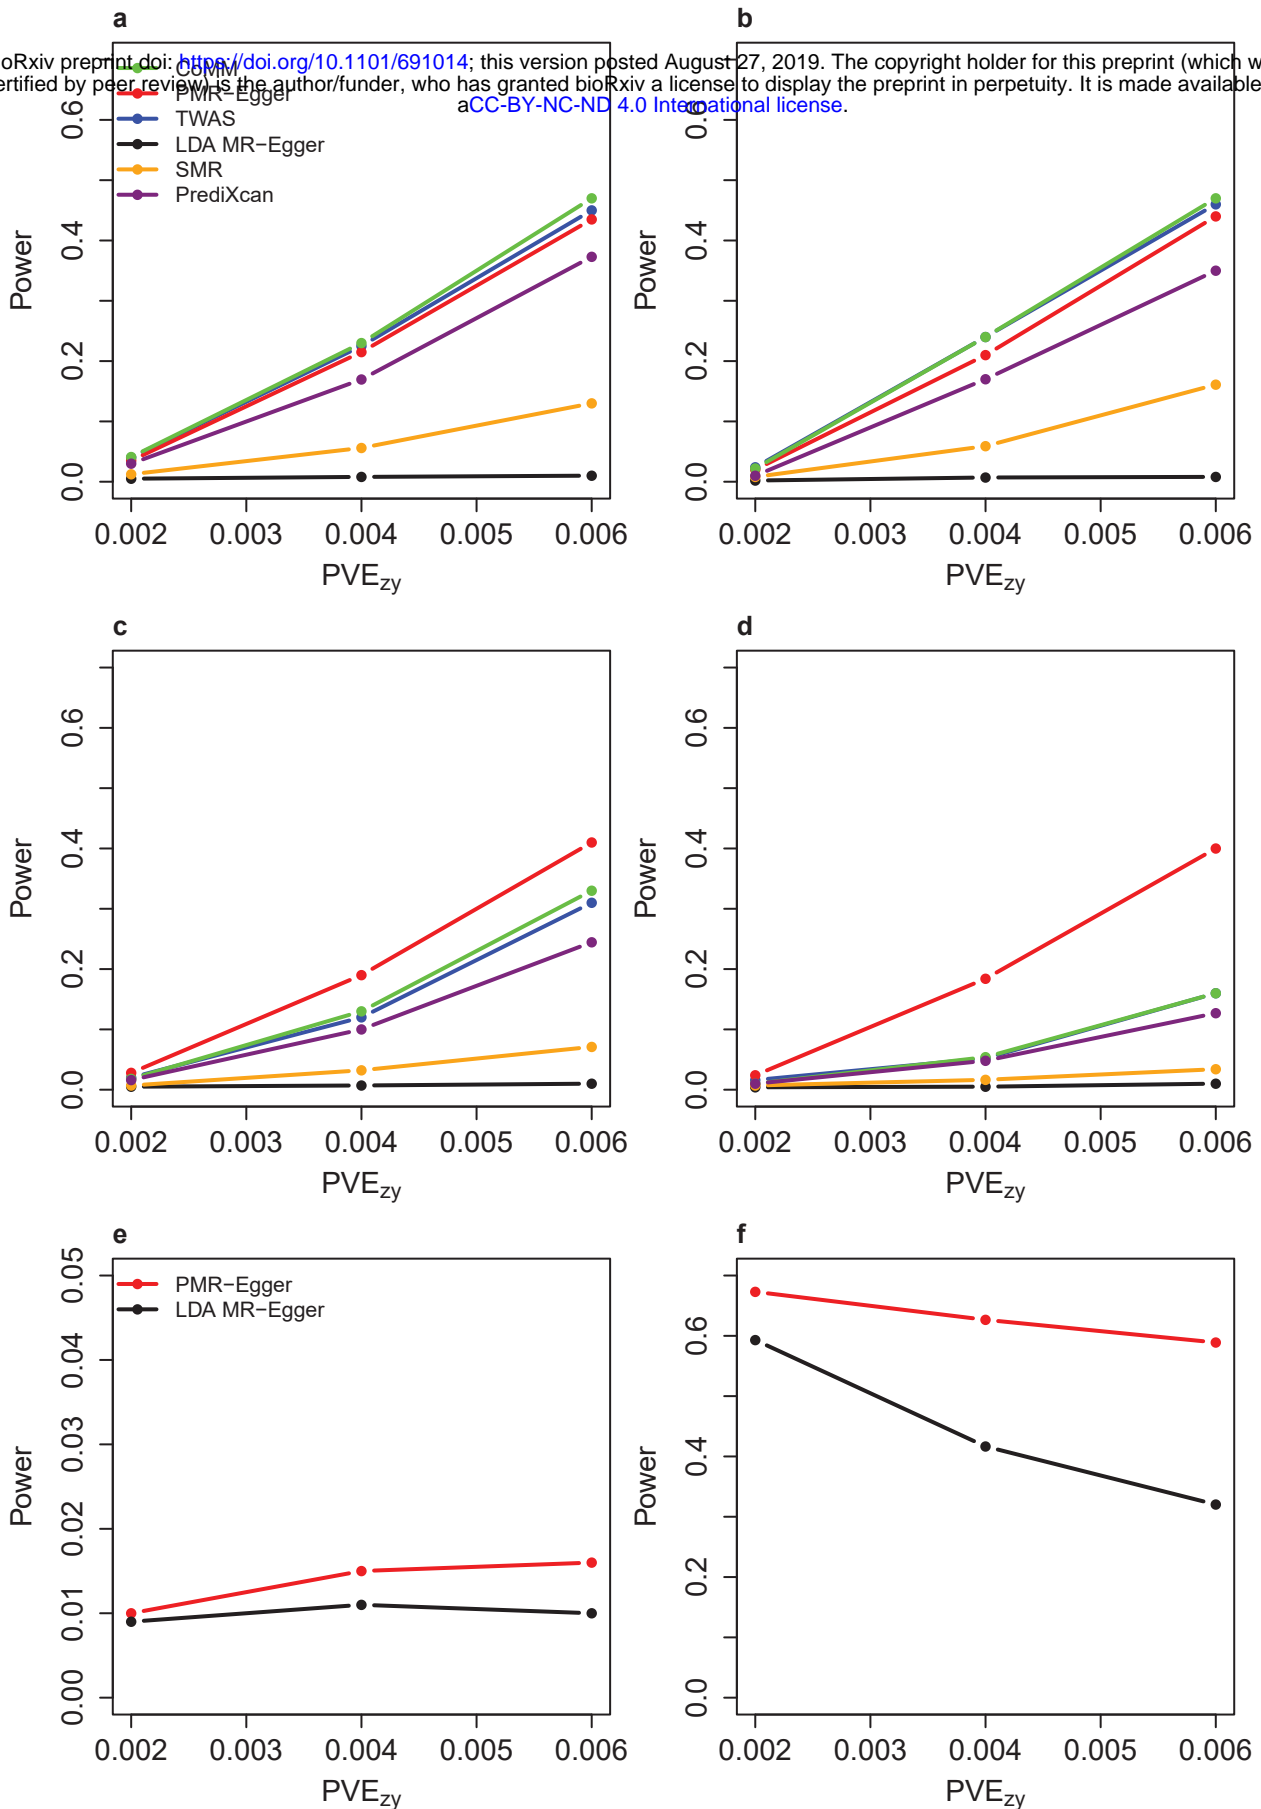

**Fig. 2** Power of different methods under various simulation scenarios. Power (y-axis) at a false discovery rate of 0.1 to detect the causal effect (a-d) or the horizontal pleiotropic effect (e-f) is plotted against different causal effect size characterized by  $PVE_{zy}$  (x-axis). Compared methods include CoMM (green), PMR-Egger (red), TWAS (blue), LDA MR-Egger (black), SMR (orange), and PrediXcan (purple). Simulations are performed under different horizontal pleiotropic effect sizes: (a)  $\gamma=0$ ; (b)  $\gamma=0.0001$ ; (c, e)  $\gamma=0.0005$ ; (d, f)  $\gamma=0.001$ .

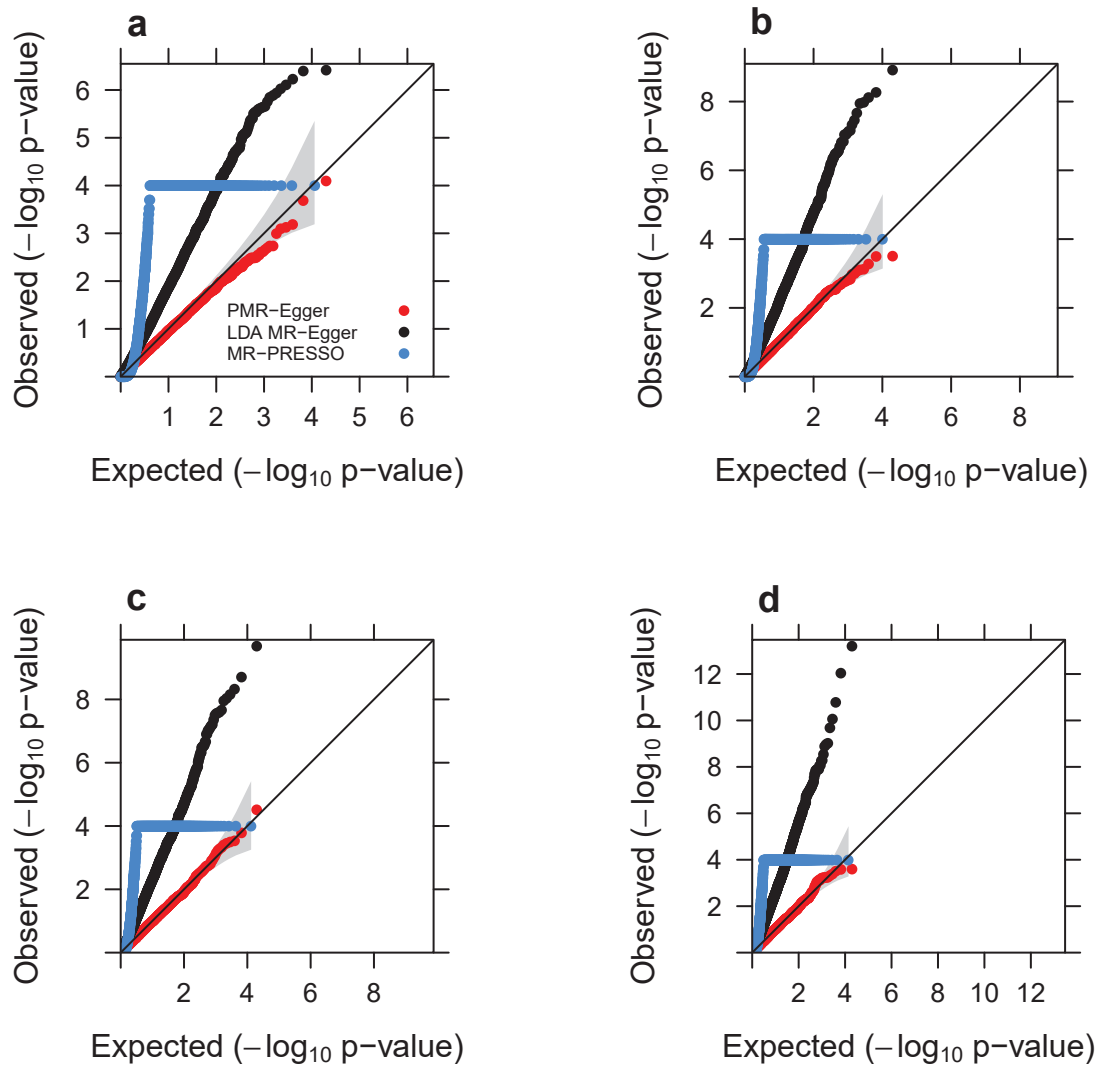

**Fig. 3** Quantile-quantile plot of  $-\log_{10}$  p-values from different methods for testing the horizontal pleiotropic effect either in the absence or in the presence of causal effect under null simulations. Compared methods include PMR-Egger (red), LDA MR-Egger (black), and MR-PRESSO (dodger blue). Null simulations are performed under different causal effect sizes characterized by  $PVE_{zy}$ : **(a)**  $PVE_{zy}=0$ ; **(b)**  $PVE_{zy}=0.2\%$ ; **(c)**  $PVE_{zy}=0.4\%$ ; and **(d)**  $PVE_{zy}=0.6\%$ . Only p-values from PMR-Egger adhere to the expected diagonal line across a range of horizontal pleiotropic effect sizes. Due to heavy computational burden, we are only able to run 10,000 permutations for MR-PRESSO. Therefore, the minimal p-value from MR-PRESSO is  $10^{-4}$ .

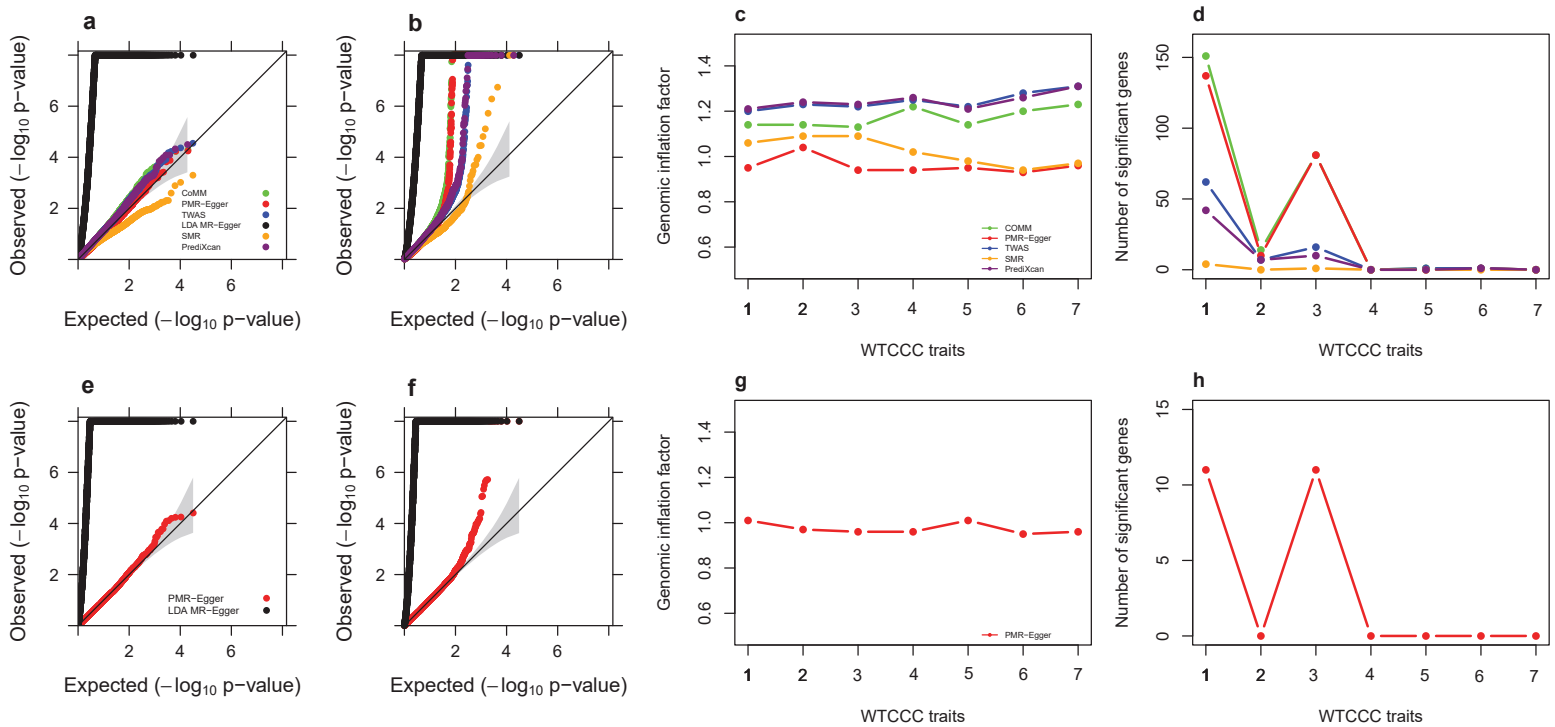

**Fig. 4** TWAS analysis results by different methods for traits in the WTCCC data. Compared methods include CoMM (green), PMR-Egger (red), TWAS (blue), LDA MR-Egger (black), SMR (orange), and PrediXcan (purple). **(a)** Quantile-quantile plot of  $-\log_{10}$  p-values from different methods for testing the causal effect for an exemplary trait BD. **(b)** Quantile-quantile plot of  $-\log_{10}$  p-values from different methods for testing the causal effect for another exemplary trait T1D. **(c)** Genomic inflation factor for testing the causal effect for each of the 7 traits by different methods. **(d)** Number of causal genes identified for each of the 7 traits by different methods. **(e)** Quantile-quantile plot of  $-\log_{10}$  p-values from different methods for testing the horizontal pleiotropic effect for an exemplary trait BD. **(f)** Quantile-quantile plot of  $-\log_{10}$  p-values from different methods for testing the horizontal pleiotropic effect for another exemplary trait T1D. **(g)** Genomic inflation factor for testing the horizontal pleiotropic effect for each of the 7 traits by different methods. **(h)** Number of genes identified to have significant horizontal pleiotropic effect for each of the 7 traits by different methods. For c, d, g, h, the number on the x-axis represents seven traits in order: T1D, CD, RA, BD, T2D, CAD, HT.

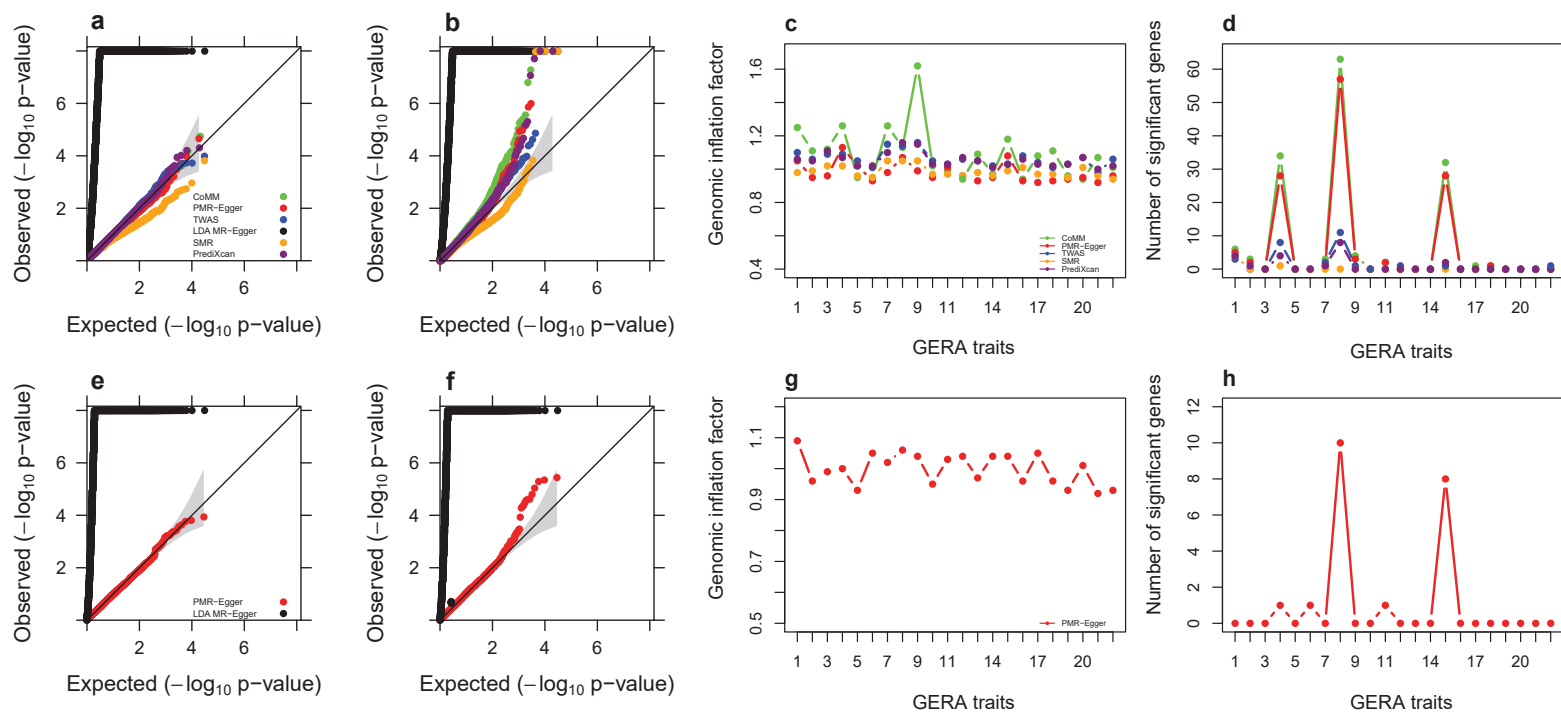

**Fig. 5** TWAS analysis results by different methods for traits in the GERA data. Compared methods include CoMM (green), PMR-Egger (red), TWAS (blue), LDA MR-Egger (black), SMR (orange), and PrediXcan (purple). **(a)** Quantile-quantile plot of  $-\log_{10}$  p-values from different methods for testing the causal effect for an exemplary trait Irritable Bowel Syndrome. **(b)** Quantile-quantile plot of  $-\log_{10}$  p-values from different methods for testing the causal effect for another exemplary trait Asthma. **(c)** Genomic inflation factor for testing the causal effect for each of the 22 traits by different methods. **(d)** Number of causal genes identified for each of the 22 traits by different methods. **(e)** Quantile-quantile plot of  $-\log_{10}$  p-values from different methods for testing the horizontal pleiotropic effect for an exemplary trait Irritable Bowel Syndrome. **(f)** Quantile-quantile plot of  $-\log_{10}$  p-values from different methods for testing the horizontal pleiotropic effect for another exemplary trait Asthma. **(g)** Genomic inflation factor for testing the horizontal pleiotropic effect for each of the 22 traits by different methods. **(h)** Number of genes identified to have significant horizontal pleiotropic effect for each of the 22 traits by different methods. For c, d, g, h, the number on the x-axis represents 22 traits in order: Asthma, Allergic Rhinitis, CARD, Cancers, Depressive Disorder, Dermatophytosis, T2D, Dyslipidemia, HT, Hemorrhoids, Abdominal Hernia, Insomnia, Iron Deficiency, Irritable Bowel Syndrome, Macular Degeneration, Osteoarthritis, Osteoporosis, PVD, Peptic Ulcer, Psychiatric disorders, Stress Disorders, Varicose Veins.

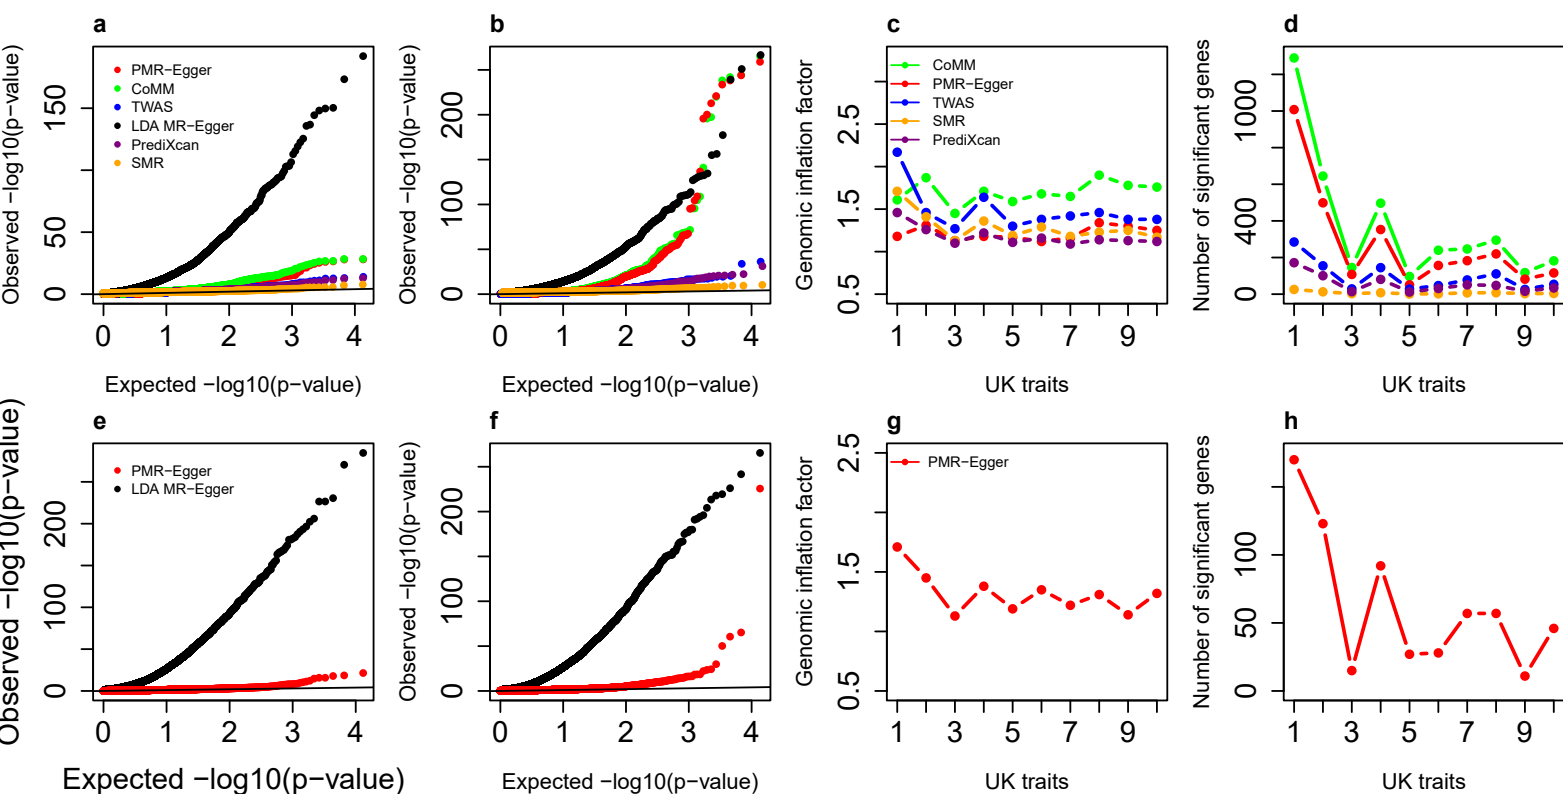

**Fig. 6** TWAS analysis results by different methods for traits in the UK Biobank data. Compared methods include CoMM (green), PMR-Egger (red), TWAS (blue), LDA MR-Egger (black), SMR (orange), and PrediXcan (purple). **(a)** Quantile-quantile plot of  $-\log_{10}$  p-values from different methods for testing the causal effect for an exemplary trait BMI. **(b)** Quantile-quantile plot of  $-\log_{10}$  p-values from different methods for testing the causal effect for another exemplary trait Platelet Count. **(c)** Genomic inflation factor for testing the causal effect for each of the 10 traits by different methods. **(d)** Number of causal genes identified for each of the 10 traits by different methods. **(e)** Quantile-quantile plot of  $-\log_{10}$  p-values from different methods for testing the horizontal pleiotropic effect for an exemplary trait BMI. **(f)** Quantile-quantile plot of  $-\log_{10}$  p-values from different methods for testing the horizontal pleiotropic effect for another exemplary trait Platelet Count. **(g)** Genomic inflation factor for testing the horizontal pleiotropic effect for each of the 10 traits by different methods. **(h)** Number of genes identified to have significant horizontal pleiotropic effect for each of the 10 traits by different methods. For c, d, g, h, the number on the x-axis represents 10 traits in order: Height, Platelet count, Bone mineral density, Red blood cell count, FEV1-FVC ratio, BMI, RDW, Eosinophils count, Forced vital capacity, White blood cell count.
